# Supplementary material
Source: PubMed Central journal article supplement (PMC8697256)
Supplement: NIHMS1721108-supplement-Supp2.pdf [file NIHMS1721108-supplement-Supp2.pdf]

## Supplemental Tables

**Table S1 Basic information of studies participating in the Stage I analyses**

| Study<br>(registry)          | Study<br>design                                                    | Race<br>/ethnicity                                | Metabolites and incident diabetes<br>analysis |                                                                                                                             | GWAS of metabolites |                                                                                     | Diet and metabolite<br>analysis |                                                                                                                                          | Gut microbiota and<br>metabolite analysis |                                                                                                                                  |
|------------------------------|--------------------------------------------------------------------|---------------------------------------------------|-----------------------------------------------|-----------------------------------------------------------------------------------------------------------------------------|---------------------|-------------------------------------------------------------------------------------|---------------------------------|------------------------------------------------------------------------------------------------------------------------------------------|-------------------------------------------|----------------------------------------------------------------------------------------------------------------------------------|
|                              |                                                                    |                                                   | N<br>(cases/all)                              | Key data                                                                                                                    | N                   | Key data                                                                            | N                               | Key data                                                                                                                                 | N                                         | Key data                                                                                                                         |
| HCHS/SOL<br>(NCT02060344)    | Prospective<br>cohort                                              | HA                                                | 367/2,821                                     | 11 fasting serum<br>tryptophan metabolites<br>at baseline;<br>Incident T2D during<br>~6-year follow-up.                     | 3,933               | Genome-wide variants;<br>11 fasting serum<br>tryptophan metabolites<br>at baseline. | 3,938                           | Dietary intakes of<br>10 major food<br>groups and fiber<br>at baseline;<br>11 fasting serum<br>tryptophan<br>metabolites at<br>baseline. | 759                                       | 4 fasting serum<br>indole metabolites at<br>baseline (2008-<br>2011);<br>91 fecal bacterial<br>genera at Visit 2<br>(2014-2017). |
| ARIC<br>(NCT00005131)        | Prospective<br>cohort                                              | EA                                                | 443/1,288                                     | 7 fasting serum<br>tryptophan metabolites<br>at baseline;<br>Incident T2D during<br>~25-year follow-up.                     | 1,509               | Genome-wide variants;<br>7 fasting serum<br>tryptophan metabolites<br>at baseline.  | NA                              | NA                                                                                                                                       | NA                                        | NA                                                                                                                               |
|                              |                                                                    | AA                                                | 593/1,443                                     |                                                                                                                             | 1,772               |                                                                                     |                                 |                                                                                                                                          |                                           |                                                                                                                                  |
| FHS<br>(NCT00005136)         | Prospective<br>cohort                                              | EA                                                | 218/1,424                                     | 8 fasting plasma<br>tryptophan metabolites<br>at baseline;<br>Incident T2D during<br>~20-year follow-up.                    | 2,076               | Genome-wide variants;<br>8 fasting plasma<br>tryptophan metabolites<br>at baseline. | NA                              | NA                                                                                                                                       | NA                                        | NA                                                                                                                               |
| WHI<br>(NCT00000611)         | Prospective<br>cohort                                              | EA (78%),<br>AA (12%),<br>HA (3%),<br>others (6%) | 163/1,392                                     | 7 fasting plasma<br>tryptophan metabolites<br>at baseline;<br>Incident T2D during<br>~17-year follow-up.                    | NA                  | NA                                                                                  | NA                              | NA                                                                                                                                       | NA                                        | NA                                                                                                                               |
| PREDIMED<br>(ISRCTN35739639) | Prospective<br>Case-cohort<br>based on an<br>intervention<br>study | Spanish                                           | 248/885                                       | 5 fasting plasma<br>tryptophan metabolites<br>at baseline;<br>Incident T2D during a<br>median of 3.8 years of<br>follow-up. | NA                  | NA                                                                                  | NA                              | NA                                                                                                                                       | NA                                        | NA                                                                                                                               |

Abbreviations: HA, Hispanic Americans; EA, European American; AA, African American; HCHS/SOL, the Hispanic Community Health Study/Study of Latinos; ARIC, the Atherosclerosis Risk in Communities study; FHS, the Framingham Study; WHI, the Women's Health Initiative; PREDIMED, Prevención con Dieta Mediterránea.

**Table S2 Regression models and covariates used in the analyses on the association between metabolites and incident type 2 diabetes**

| <b>Cohort</b>   | <b>Regression models</b>                         | <b>Covariates in Model 1</b>                                                                                                                                                                                                                                                                                                        | <b>Covariates in Model 2</b>           | <b>Covariates in Model 3</b>               | <b>Covariates in Model 4</b>              | <b>Covariates in Model 5</b> |
|-----------------|--------------------------------------------------|-------------------------------------------------------------------------------------------------------------------------------------------------------------------------------------------------------------------------------------------------------------------------------------------------------------------------------------|----------------------------------------|--------------------------------------------|-------------------------------------------|------------------------------|
| <b>HCHS/SOL</b> | Cox regressions                                  | Age, sex, smoking, alcohol consumption, education, family income, fasting status, lipid-lowering medication use, anti-hypertensive medications, family history of diabetes, and study sampling weights.                                                                                                                             | Model 1 + BMI and WHR.                 | Model 1 + physical activity and AHEI-2010. | Model 1 + HDL-C, LDL-C and triglycerides. | Model 1 + SBP + DBP.         |
| <b>ARIC</b>     | Cox regressions                                  | Age, sex, race/ethnicity, smoking, alcohol consumption, education, anti-hypertensive medications, family history of diabetes, and self-reported physician-diagnosed hypertension.                                                                                                                                                   | Model 1 + BMI and WHR.                 | Model 1 + physical activity and AHEI-2010. | Model 1 + HDL-C, LDL-C and triglycerides. | Model 1 + SBP + DBP.         |
| <b>WHI</b>      | Cox regressions                                  | Age, smoking, alcohol consumption, education, family income, fasting status, lipid-lowering medication use, anti-hypertensive medications, family history of diabetes, self-reported physician-diagnosed hypertension, self-reported physician-diagnosed dyslipidemia, study arm, coronary heart disease case-control status, race. | Model 1 + BMI and WHR.                 | Model 1 + physical activity and HEI-2005.  | Model 1 + HDL-C and total cholesterol.    | Model 1 + SBP + DBP.         |
| <b>FHS</b>      | Cox regressions                                  | Age, sex, smoking, alcohol consumption, education, lipid-lowering medication use, anti-hypertensive medications, family history of diabetes, self-reported physician-diagnosed hypertension, and self-reported physician-diagnosed dyslipidemia.                                                                                    | Model 1 + BMI and WHR.                 | Model 1 + physical activity and AHEI-2010. | Model 1 + HDL-C, LDL-C and triglycerides. | Model 1 + SBP + DBP.         |
| <b>PREDIMED</b> | Weighted Cox regressions for case-cohort designs | Age, smoking, sex, lipid-lowering medication use, anti-hypertensive medications, self-reported physician-diagnosed hypertension, self-reported physician-diagnosed dyslipidemia, intervention arms, study center, and propensity scores.                                                                                            | Model 1 + BMI and waist circumference. | Not available.                             | Model 1 + HDL-C, LDL-C and triglycerides. | Model 1 + SBP + DBP.         |

Abbreviations: HCHS/SOL, the Hispanic Community Health Study/Study of Latinos; ARIC, the Atherosclerosis Risk in Communities study; FHS, the Framingham Study; WHI, the Women's Health Initiative; PREDIMED, Prevención con Dieta Mediterránea; BMI, body mass index; WHR, waist-hip ratio; SBP, systolic blood pressure; DBP, diastolic blood pressure; AHEI-2010, alternate healthy eating index 2010; HEI-2005, healthy eating index 2005; HDL-C, high-density lipoprotein cholesterol; LDL-C, low-density lipoprotein cholesterol.

**Table S3 Basic information of studies participating in the Stage II analyses**

| Study                   | Study design              | Race /ethnicity | Latent causal variable analysis       |                                                                           | Fiber, gut microbiota and metabolite analysis |                                                                                                                     | Milk- <i>LCT</i> interaction analysis on IPA |                                                                                                   | Milk- <i>LCT</i> interaction analysis on <i>Bifidobacterium</i> |                                                                                                             |
|-------------------------|---------------------------|-----------------|---------------------------------------|---------------------------------------------------------------------------|-----------------------------------------------|---------------------------------------------------------------------------------------------------------------------|----------------------------------------------|---------------------------------------------------------------------------------------------------|-----------------------------------------------------------------|-------------------------------------------------------------------------------------------------------------|
|                         |                           |                 | N                                     | Key data                                                                  | N                                             | Key data                                                                                                            | N                                            | Key data                                                                                          | N                                                               | Key data                                                                                                    |
| HCHS/SOL                | Prospective cohort        | HA              | NA                                    | NA                                                                        | 2,759                                         | Fiber intake at baseline (2008-2011);<br>21 IPA-associated fecal bacterial genera at Visit 2 (2014-2017).           | 3,899                                        | <i>LCT</i> variant (SNP-rs4988235);<br>Milk intake at baseline;<br>Fasting serum IPA at baseline. | 2,342                                                           | <i>LCT</i> variant (SNP-rs4988235);<br>Milk intake at baseline;<br>Fecal <i>Bifidobacterium</i> at Visit 2. |
|                         |                           |                 |                                       |                                                                           | 752                                           | Fiber intake at baseline;<br>Fasting serum IPA at baseline;<br>21 IPA-associated fecal bacterial genera at Visit 2. |                                              |                                                                                                   |                                                                 |                                                                                                             |
| ARIC                    | Prospective cohort        | EA              | NA                                    | NA                                                                        | NA                                            | NA                                                                                                                  | 1,504                                        | Milk intake at baseline;<br><i>LCT</i> variant (SNP-rs4988235);<br>Fasting serum IPA at baseline. | NA                                                              | NA                                                                                                          |
|                         |                           | AA              |                                       |                                                                           |                                               |                                                                                                                     | 1,674                                        |                                                                                                   |                                                                 |                                                                                                             |
| HCHS/SOL<br>ARIC<br>FHS | Genome-wide meta-analysis | HA              | 3,933                                 | GWAS summary statistics for 11 fasting circulating tryptophan metabolites | NA                                            | NA                                                                                                                  | NA                                           | NA                                                                                                | NA                                                              | NA                                                                                                          |
|                         |                           | EA              | 1,509                                 |                                                                           |                                               |                                                                                                                     |                                              |                                                                                                   |                                                                 |                                                                                                             |
|                         |                           | AA              | 1,772                                 |                                                                           |                                               |                                                                                                                     |                                              |                                                                                                   |                                                                 |                                                                                                             |
|                         |                           | EA              | 2,076                                 |                                                                           |                                               |                                                                                                                     |                                              |                                                                                                   |                                                                 |                                                                                                             |
| DIAGRAM                 | Genome-wide meta-analysis | White           | 55,005 T2D cases/<br>400,308 controls | Publicly available GWAS summary statistics for T2D                        | NA                                            | NA                                                                                                                  | NA                                           | NA                                                                                                | NA                                                              | NA                                                                                                          |

Abbreviations: HA, Hispanic Americans; EA, European American; AA, African American; IPA, indolepropionate; HCHS/SOL, the Hispanic Community Health Study/Study of Latinos; ARIC, the Atherosclerosis Risk in Communities study; FHS, the Framingham Study; DIAGRAM, Diabetes Genetics Replication and Meta-analysis Consortium.

**Table S4 Characteristics of study participants free of diabetes at baseline**

|                                         | <b>HCHS/SOL</b>     | <b>ARIC</b>          | <b>FHS</b>          | <b>PREMED</b>       | <b>WHI</b>          |
|-----------------------------------------|---------------------|----------------------|---------------------|---------------------|---------------------|
| <b>N</b>                                | 2821                | 2721                 | 1,424               | 885                 | 1,392               |
| <b>Age, years</b>                       | 45 (33-53)          | 52 (48- 58)          | 55 (9.5)            | 66 (62-71)          | 67.1 (6.9)          |
| <b>Women</b>                            | 1610 (57.1%)        | 1624 (59.7%)         | 741 (52.0%)         | 540 (61%)           | 1,392 (100%)        |
| <b>Race/ethnicity</b>                   |                     |                      |                     |                     |                     |
| <b>Hispanics/Latinos</b>                | 2821 (100%)         | NA                   | NA                  | NA                  | 45 (3.2%)           |
| <b>Non-Hispanic whites</b>              | NA                  | 1288 (47.3%)         | 1,424 (100%)        | 885 (100%)          | 1,088 (78.2%)       |
| <b>African American/Others</b>          | NA                  | 1433 (52.7%)         | NA                  | NA                  | 259 (18.6%)         |
| <b>Education, less than high school</b> | 906 (32.2%)         | 286 (10.5%)          | 82 (5.8%)           | NA                  | 105 (7.5%)          |
| <b>Current smoking</b>                  | 606 (21.5%)         | 724 (26.6%)          | 248 (17.4%)         | 165 (18.6%)         | 146 (10.5%)         |
| <b>AHEI-2010 or HEI-2005</b>            | 47.5 (42.5-53.1)    | 48.9 (41.2- 57.2 )   | 42.2 (10.0)         | NA                  | 67.2 (11.2)*        |
| <b>Family history of diabetes</b>       | 1132 (40.2%)        | 757 (27.8%)          | 247 (17.3%)         | 242 (27.3%)         | 437 (31.4%)         |
| <b>Self-reported dyslipidemia</b>       | NA                  | NA                   | NA                  | 745 (84.2%)         | 237 (17.0%)         |
| <b>Self-reported hypertension</b>       | NA                  | 1076 (39.5%)         | NA                  | 811 (91.6%)         | 733 (52.7%)         |
| <b>Lipid-lowering medication use</b>    | 144 (5.2%)          | NA                   | 90 (6.3%)           | 32 (3.6%)           | 160 (11.5%)         |
| <b>Anti-hypertensive medication use</b> | 252 (9.1%)          | 765 (28.1%)          | 305 (21.4%)         | 427 (48.2%)         | 339 (24.4%)         |
| <b>BMI, kg/m<sup>2</sup></b>            | 28.4 (25.1-32.0)    | 27.2 (24.5- 30.7 )   | 27.3 (4.6)          | 29.7 (27.6-32.2)    | 27.92 (5.9)         |
| <b>Waist-to-Hip Ratio</b>               | 0.9 (0.9-1.0)       | 0.9 (0.9- 1.0)       | 0.9 (0.1)           | NA                  | 0.8 (0.1)           |
| <b>HDL cholesterol, mg/dL</b>           | 48.0 (41.0-57.0)    | 51.0 (41.4- 63.9)    | 48.0 (39.0-59.0)    | 51.0 (45.0-59.0)    | 51.0 (42.0-61.7)    |
| <b>LDL cholesterol, mg/dL</b>           | 121.0 (98.0-144.0)  | 133.7 (108.8- 160.2) | 126.2 (105.4-148.9) | 137.0 (114.0-161.0) | NA                  |
| <b>Triglycerides, mg/dL</b>             | 108.0 (75.0-156.0)  | 100.0 (73.0- 142.0)  | 116.0 (83.0-169.5)  | 115.0 (91.0-156.0)  | NA                  |
| <b>Systolic blood pressure, mmHg</b>    | 118.0 (109.0-129.0) | 120.0 (109.0- 133.0) | 124.0 (112.3-136.0) | 147.5 (136.8-161.0) | 130.5 (120.0-143.0) |
| <b>Diastolic blood pressure, mmHg</b>   | 72.0 (66.0-79.0)    | 75.0 (68.0- 83.0)    | 74.0 (68.0-81.0)    | 84.2 (78.0-90.5)    | 75.0 (69.0-82.0)    |

Data were presented as mean (standard deviation), median (25th-75th), or n (%).

\* WHI used HEI-2005.

Abbreviations: HCHS/SOL, the Hispanic Community Health Study/Study of Latinos; ARIC, the Atherosclerosis Risk in Communities study; FHS, the Framingham Study; WHI, the Women's Health Initiative; PREDIMED, Prevención con Dieta Mediterránea; AHEI-2010, Alternate Healthy Eating Index 2010; HEI-2005, Healthy Eating Index 2005; BMI, body mass index; HDL, high-density lipoprotein; LDL, low-density lipoprotein.

**Table S5 Associations between the 11 tryptophan metabolites and risk of type 2 diabetes in HCHS/SOL, replication studies and all combined**

|                      | Cases/participants | Model 1          |        |       | Model 2          |        |       | Model 3          |        |       | Model 4          |        |       | Model 5          |        |       |
|----------------------|--------------------|------------------|--------|-------|------------------|--------|-------|------------------|--------|-------|------------------|--------|-------|------------------|--------|-------|
|                      |                    | HR (95% CI)      | P      | P-het |
| <b>Tryptophan</b>    |                    |                  |        |       |                  |        |       |                  |        |       |                  |        |       |                  |        |       |
| HCHS/ SOL            | 367/2821           | 1.11 (0.97-1.26) | 0.14   |       | 1.05 (0.92-1.20) | 0.49   |       | 1.10 (0.97-1.26) | 0.14   |       | 1.15 (1.02-1.28) | 0.018  |       | 1.09 (0.96-1.25) | 0.18   |       |
| FHS                  | 218/1424           | 1.23 (1.08-1.39) | 0.002  |       | 1.19 (1.05-1.35) | 0.008  |       | 1.24 (1.09-1.41) | 0.001  |       | 1.19 (1.05-1.36) | 0.009  |       | 1.23 (1.08-1.40) | 0.002  |       |
| PREDIMED             | 248/885            | 1.06 (0.87-1.29) | 0.57   |       | 1.07 (0.88-1.30) | 0.5    |       | NA               | NA     |       | 1.03 (0.84-1.26) | 0.77   |       | 1.06 (0.87-1.28) | 0.58   |       |
| WHI                  | 163/1329           | 1.08 (0.91-1.27) | 0.38   |       | 1.11 (0.94-1.31) | 0.23   |       | 1.10 (0.93-1.29) | 0.26   |       | 1.04 (0.88-1.23) | 0.63   |       | 1.08 (0.91-1.27) | 0.38   |       |
| ARIC                 | 1036/2721          | 1.12 (1.05-1.20) | 0.001  |       | 1.09 (1.02-1.17) | 0.013  |       | 1.12 (1.05-1.20) | <0.001 |       | 1.08 (1.01-1.16) | 0.03   |       | 1.12 (1.05-1.20) | <0.001 |       |
| Replication combined | 1665/6359          | 1.13 (1.07-1.19) | <0.001 | 0.49  | 1.11 (1.05-1.17) | <0.001 | 0.67  | 1.14 (1.08-1.21) | <0.001 | 0.33  | 1.09 (1.03-1.15) | 0.002  | 0.49  | 1.13 (1.07-1.19) | <0.001 | 0.46  |
| All combined         | 2032/9180          | 1.12 (1.07-1.18) | <0.001 | 0.64  | 1.10 (1.05-1.16) | <0.001 | 0.71  | 1.13 (1.08-1.19) | <0.001 | 0.5   | 1.10 (1.05-1.16) | <0.001 | 0.55  | 1.12 (1.07-1.18) | <0.001 | 0.6   |
| <b>Serotonin</b>     |                    |                  |        |       |                  |        |       |                  |        |       |                  |        |       |                  |        |       |
| HCHS/ SOL            | 367/2821           | 1.07 (0.94-1.21) | 0.32   |       | 1.11 (0.97-1.26) | 0.13   |       | 1.07 (0.94-1.21) | 0.33   |       | 1.03 (0.92-1.16) | 0.63   |       | 1.07 (0.94-1.21) | 0.31   |       |
| FHS                  | 218/1424           | 0.98 (0.87-1.10) | 0.71   |       | 0.97 (0.86-1.11) | 0.67   |       | 0.98 (0.87-1.11) | 0.74   |       | 0.98 (0.87-1.11) | 0.78   |       | 0.98 (0.87-1.11) | 0.77   |       |
| WHI                  | 163/1329           | 0.84 (0.72-0.98) | 0.028  |       | 0.89 (0.76-1.04) | 0.14   |       | 0.84 (0.72-0.98) | 0.023  |       | 0.87 (0.74-1.02) | 0.078  |       | 0.84 (0.72-0.98) | 0.03   |       |
| ARIC                 | 1036/2721          | 0.96 (0.90-1.02) | 0.18   |       | 1.00 (0.93-1.06) | 0.93   |       | 0.95 (0.90-1.02) | 0.15   |       | 0.94 (0.85-1.01) | 0.11   |       | 0.96 (0.90-1.02) | 0.23   |       |
| Replication combined | 1417/5474          | 0.95 (0.90-1.00) | 0.043  | 0.26  | 0.98 (0.92-1.03) | 0.45   | 0.41  | 0.94 (0.90-1.00) | 0.033  | 0.24  | 0.94 (0.89-1.00) | 0.039  | 0.47  | 0.95 (0.90-1.00) | 0.063  | 0.25  |
| All combined         | 1784/8295          | 0.96 (0.92-1.01) | 0.13   | 0.14  | 1.00 (0.95-1.05) | 0.92   | 0.2   | 0.96 (0.91-1.01) | 0.11   | 0.12  | 0.96 (0.91-1.01) | 0.095  | 0.36  | 0.97 (0.92-1.02) | 0.18   | 0.14  |
| <b>Kynurenine</b>    |                    |                  |        |       |                  |        |       |                  |        |       |                  |        |       |                  |        |       |
| HCHS/ SOL            | 367/2821           | 1.20 (1.06-1.36) | 0.004  |       | 1.05 (0.92-1.20) | 0.45   |       | 1.19 (1.05-1.35) | 0.006  |       | 1.14 (1.01-1.29) | 0.036  |       | 1.17 (1.03-1.33) | 0.013  |       |
| FHS                  | 218/1424           | 1.27 (1.10-1.45) | 0.001  |       | 1.04 (0.91-1.20) | 0.54   |       | 1.26 (1.09-1.45) | 0.002  |       | 1.13 (0.98-1.31) | 0.096  |       | 1.23 (1.06-1.42) | 0.006  |       |
| PREDIMED             | 248/885            | 1.00 (0.84-1.18) | 0.96   |       | 0.95 (0.79-1.13) | 0.54   |       | NA               | NA     |       | 0.96 (0.80-1.14) | 0.62   |       | 0.96 (0.81-1.14) | 0.66   |       |
| WHI                  | 163/1329           | 1.35 (1.13-1.39) | 0.001  |       | 1.24 (1.03-1.49) | 0.022  |       | 1.34 (1.12-1.60) | 0.001  |       | 1.18 (0.98-1.41) | 0.079  |       | 1.36 (1.14-1.62) | 0.001  |       |
| ARIC                 | 1036/2721          | 1.16 (1.09-1.24) | <0.001 |       | 1.07 (1.00-1.15) | 0.056  |       | 1.17 (1.09-1.25) | <0.001 |       | 1.08 (1.01-1.16) | 0.023  |       | 1.15 (1.07-1.23) | <0.001 |       |
| Replication combined | 1665/6359          | 1.18 (1.11-1.24) | <0.001 | 0.06  | 1.07 (1.01-1.13) | 0.022  | 0.22  | 1.20 (1.13-1.27) | <0.001 | 0.27  | 1.09 (1.03-1.15) | 0.004  | 0.37  | 1.16 (1.10-1.22) | <0.001 | 0.04  |
| All combined         | 2032/9180          | 1.18 (1.12-1.24) | <0.001 | 0.12  | 1.06 (1.01-1.12) | 0.016  | 0.35  | 1.20 (1.14-1.26) | <0.001 | 0.46  | 1.09 (1.04-1.15) | 0.001  | 0.46  | 1.16 (1.10-1.22) | <0.001 | 0.09  |
| <b>Kynurenate</b>    |                    |                  |        |       |                  |        |       |                  |        |       |                  |        |       |                  |        |       |
| HCHS/ SOL            | 367/2821           | 1.22 (1.08-1.38) | 0.002  |       | 1.10 (0.97-1.25) | 0.15   |       | 1.21 (1.07-1.37) | 0.002  |       | 1.11 (0.99-1.25) | 0.062  |       | 1.19 (1.05-1.35) | 0.006  |       |
| FHS                  | 218/1424           | 1.11 (0.96-1.27) | 0.15   |       | 0.99 (0.85-1.14) | 0.84   |       | 1.11 (0.97-1.28) | 0.13   |       | 1.07 (0.93-1.24) | 0.34   |       | 1.07 (0.93-1.23) | 0.35   |       |

|                         |           |                  |        |      |                  |        |      |                  |        |      |                  |        |       |                  |        |      |
|-------------------------|-----------|------------------|--------|------|------------------|--------|------|------------------|--------|------|------------------|--------|-------|------------------|--------|------|
| WHI                     | 163/1329  | 1.31 (1.11-1.54) | 0.002  |      | 1.22 (1.03-1.45) | 0.019  |      | 1.29 (1.10-1.53) | 0.002  |      | 1.23 (1.04-1.45) | 0.018  |       | 1.30 (1.11-1.54) | 0.002  |      |
| Replication combined    | 381/2753  | 1.18 (1.06-1.32) | 0.002  | 0.13 | 1.08 (0.97-1.21) | 0.17   | 0.06 | 1.19 (1.06-1.32) | 0.002  | 0.18 | 1.14 (1.02-1.27) | 0.023  | 0.25  | 1.16 (1.05-1.30) | 0.006  | 0.08 |
| All combined            | 748/5574  | 1.20 (1.11-1.30) | <0.001 | 0.31 | 1.09 (1.00-1.18) | 0.046  | 0.16 | 1.20 (1.10-1.30) | <0.001 | 0.39 | 1.13 (1.04-1.22) | 0.003  | 0.5   | 1.18(1.08-1.28)  | <0.001 | 0.2  |
| <b>Xanthurenate</b>     |           |                  |        |      |                  |        |      |                  |        |      |                  |        |       |                  |        |      |
| HCHS/ SOL               | 367/2821  | 1.18 (1.05-1.33) | 0.007  |      | 1.14 (1.00-1.28) | 0.042  |      | 1.19 (1.05-1.34) | 0.006  |      | 1.11 (0.99-1.23) | 0.062  |       | 1.18 (1.04-1.33) | 0.008  |      |
| FHS                     | 218/1424  | 1.51 (1.30-1.77) | <0.001 |      | 1.38 (1.17-1.62) | <0.001 |      | 1.53 (1.31-1.78) | <0.001 |      | 1.49 (1.26-1.75) | <0.001 |       | 1.45 (1.24-1.69) | <0.001 |      |
| WHI                     | 163/1329  | 1.12 (0.95-1.32) | 0.19   |      | 1.06 (0.90-1.25) | 0.5    |      | 1.10 (0.94-1.30) | 0.24   |      | 1.06 (0.90-1.25) | 0.5    |       | 1.12 (0.95-1.32) | 0.19   |      |
| Replication combined    | 381/2753  | 1.31 (1.17-1.47) | <0.001 | 0.01 | 1.21 (1.08-1.36) | 0.001  | 0.02 | 1.31 (1.17-1.47) | <0.001 | 0.01 | 1.26 (1.12-1.42) | <0.001 | 0.004 | 1.28 (1.15-1.44) | <0.001 | 0.02 |
| All combined            | 748/5574  | 1.25 (1.15-1.36) | <0.001 | 0.01 | 1.18 (1.08-1.28) | <0.001 | 0.06 | 1.25 (1.15-1.36) | <0.001 | 0.01 | 1.17 (1.09-1.27) | <0.001 | 0.01  | 1.23 (1.14-1.34) | <0.001 | 0.05 |
| <b>Quinolinate</b>      |           |                  |        |      |                  |        |      |                  |        |      |                  |        |       |                  |        |      |
| HCHS/ SOL               | 367/2821  | 1.12 (0.99-1.26) | 0.082  |      | 0.96 (0.84-1.10) | 0.51   |      | 1.11 (0.98-1.25) | 0.11   |      | 1.11 (0.99-1.25) | 0.076  |       | 1.08 (0.96-1.22) | 0.22   |      |
| FHS                     | 218/1424  | 1.28 (1.12-1.46) | <0.001 |      | 1.07 (0.93-1.22) | 0.36   |      | 1.26 (1.10-1.44) | 0.001  |      | 1.14 (1.00-1.31) | 0.051  |       | 1.27 (1.11-1.45) | <0.001 |      |
| PREDIMED                | 248/885   | 0.96 (0.81-1.13) | 0.61   |      | 0.90 (0.75-1.06) | 0.2    |      | NA               | NA     |      | 0.89 (0.75-1.06) | 0.19   |       | 0.96 (0.81-1.13) | 0.62   |      |
| Replication combined    | 466/2309  | 1.14 (1.03-1.27) | 0.01   | 0.01 | 1.00 (0.90-1.11) | 0.95   | 0.11 | NA               | NA     | NA   | 1.04 (0.94-1.16) | 0.47   | 0.03  | 1.14 (1.03-1.27) | 0.012  | 0.01 |
| All combined            | 833/5130  | 1.13 (1.05-1.23) | 0.002  | 0.03 | 0.98 (0.90-1.07) | 0.67   | 0.27 | 1.17 (1.07-1.29) | <0.001 | 0.15 | 1.07 (0.99-1.16) | 0.084  | 0.06  | 1.12 (1.03-1.21) | 0.006  | 0.03 |
| <b>Picolinate</b>       |           |                  |        |      |                  |        |      |                  |        |      |                  |        |       |                  |        |      |
| HCHS/ SOL               | 367/2821  | 1.02 (0.90-1.16) | 0.75   |      | 1.03 (0.90-1.17) | 0.68   |      | 1.03 (0.90-1.16) | 0.69   |      | 1.06 (0.95-1.19) | 0.31   |       | 1.04 (0.92-1.18) | 0.54   |      |
| <b>Indoleacetate</b>    |           |                  |        |      |                  |        |      |                  |        |      |                  |        |       |                  |        |      |
| HCHS/ SOL               | 367/2821  | 0.91 (0.81-1.03) | 0.12   |      | 0.88 (0.78-0.99) | 0.041  |      | 0.90 (0.80-1.02) | 0.095  |      | 0.90 (0.81-1.01) | 0.073  |       | 0.91 (0.81-1.03) | 0.13   |      |
| ARIC                    | 1036/2721 | 1.02 (0.96-1.09) | 0.52   |      | 1.02 (0.96-1.09) | 0.53   |      | 1.03 (0.97-1.10) | 0.34   |      | 1.00 (0.94-1.06) | 0.92   |       | 1.03 (0.96-1.09) | 0.43   |      |
| Replication combined    | 1036/2721 | 1.02 (0.96-1.09) | 0.52   | NA   | 1.02 (0.96-1.09) | 0.53   | NA   | 1.03 (0.97-1.10) | 0.34   | NA   | 1.00 (0.94-1.06) | 0.92   | NA    | 1.03 (0.96-1.09) | 0.43   | NA   |
| All combined            | 1403/5542 | 1.00 (0.94-1.06) | 0.88   | 0.1  | 0.99 (0.94-1.05) | 0.71   | 0.04 | 1.00 (0.95-1.06) | 0.95   | 0.06 | 0.97 (0.92-1.03) | 0.32   | 0.13  | 1.00 (0.95-1.06) | 0.99   | 0.09 |
| <b>Indolelactate</b>    |           |                  |        |      |                  |        |      |                  |        |      |                  |        |       |                  |        |      |
| HCHS/ SOL               | 367/2821  | 1.30 (1.13-1.48) | <0.001 |      | 1.23 (1.08-1.41) | 0.002  |      | 1.30 (1.14-1.48) | <0.001 |      | 1.18 (1.06-1.32) | 0.003  |       | 1.29 (1.13-1.48) | <0.001 |      |
| ARIC                    | 1036/2721 | 1.13 (1.05-1.21) | 0.001  |      | 1.09 (1.01-1.17) | 0.022  |      | 1.13 (1.06-1.22) | 0.001  |      | 1.09 (1.02-1.18) | 0.016  |       | 1.12 (1.04-1.20) | 0.002  |      |
| Replication combined    | 1036/2721 | 1.13 (1.05-1.21) | 0.001  | NA   | 1.09 (1.01-1.17) | 0.022  | NA   | 1.13 (1.06-1.22) | 0.001  | NA   | 1.09 (1.02-1.18) | 0.016  | NA    | 1.12 (1.04-1.20) | 0.002  | NA   |
| All combined            | 1403/5542 | 1.16 (1.09-1.24) | <0.001 | 0.07 | 1.12 (1.05-1.19) | 0.001  | 0.11 | 1.17 (1.10-1.24) | <0.001 | 0.08 | 1.12 (1.05-1.19) | <0.001 | 0.25  | 1.15 (1.08-1.23) | <0.001 | 0.06 |
| <b>Indolepropionate</b> |           |                  |        |      |                  |        |      |                  |        |      |                  |        |       |                  |        |      |
| HCHS/ SOL               | 367/2821  | 0.80 (0.71-0.90) | <0.001 |      | 0.86 (0.76-0.97) | 0.018  |      | 0.81 (0.71-0.91) | <0.001 |      | 0.77 (0.69-0.87) | <0.001 |       | 0.81 (0.72-0.92) | 0.001  |      |

|                        |           |                  |        |      |                  |       |      |                  |        |      |                  |        |      |                  |        |      |
|------------------------|-----------|------------------|--------|------|------------------|-------|------|------------------|--------|------|------------------|--------|------|------------------|--------|------|
| FHS                    | 218/1424  | 0.87 (0.76-0.99) | 0.035  |      | 0.94 (0.82-1.07) | 0.35  |      | 0.88 (0.77-1.00) | 0.053  |      | 0.87 (0.76-0.99) | 0.034  |      | 0.86 (0.76-0.99) | 0.03   |      |
| PREDIMED               | 248/885   | 0.86 (0.72-1.03) | 0.11   |      | 0.93 (0.77-1.12) | 0.44  |      | NA               | NA     |      | 0.84 (0.69-1.02) | 0.073  |      | 0.86 (0.72-1.04) | 0.12   |      |
| WHI                    | 163/1329  | 0.80 (0.68-0.95) | 0.011  |      | 0.91 (0.76-1.08) | 0.28  |      | 0.83 (0.70-0.99) | 0.038  |      | 0.83 (0.70-0.98) | 0.031  |      | 0.80 (0.67-0.95) | 0.01   |      |
| ARIC                   | 1036/2721 | 0.92 (0.86-0.98) | 0.009  |      | 0.96 (0.90-1.02) | 0.2   |      | 0.93 (0.87-0.99) | 0.025  |      | 0.93 (0.88-1.00) | 0.038  |      | 0.92 (0.86-0.98) | 0.008  |      |
| Replication combined   | 1665/6359 | 0.89 (0.85-0.94) | <0.001 | 0.44 | 0.95 (0.90-1.00) | 0.049 | 0.94 | 0.91 (0.86-0.96) | 0.001  | 0.42 | 0.91 (0.86-0.95) | <0.001 | 0.39 | 0.89 (0.85-0.94) | <0.001 | 0.44 |
| All combined           | 2032/9180 | 0.88 (0.84-0.92) | <0.001 | 0.24 | 0.93 (0.89-0.98) | 0.006 | 0.66 | 0.89 (0.85-0.94) | <0.001 | 0.2  | 0.88 (0.84-0.93) | <0.001 | 0.07 | 0.88 (0.84-0.92) | <0.001 | 0.35 |
| <b>Indoxyl sulfate</b> |           |                  |        |      |                  |       |      |                  |        |      |                  |        |      |                  |        |      |
| HCHS/ SOL              | 367/2821  | 0.93 (0.83-1.04) | 0.22   |      | 0.93 (0.82-1.04) | 0.19  |      | 0.92 (0.82-1.03) | 0.16   |      | 1.04 (0.92-1.17) | 0.52   |      | 0.93 (0.83-1.05) | 0.23   |      |
| FHS                    | 218/1424  | 1.00 (0.88-1.13) | 0.95   |      | 1.02 (0.89-1.16) | 0.82  |      | 0.99 (0.87-1.12) | 0.84   |      | 0.94 (0.82-1.07) | 0.34   |      | 1.00 (0.88-1.13) | 0.97   |      |
| PREDIMED               | 248/885   | 1.03 (0.87-1.21) | 0.75   |      | 1.01 (0.85-1.20) | 0.9   |      | NA               | NA     |      | 0.98 (0.82-1.16) | 0.79   |      | 1.04 (0.88-1.24) | 0.62   |      |
| WHI                    | 163/1329  | 0.92 (0.79-1.08) | 0.32   |      | 0.92 (0.78-1.08) | 0.28  |      | 0.91 (0.78-1.07) | 0.25   |      | 0.84 (0.72-0.99) | 0.035  |      | 0.93 (0.79-1.08) | 0.33   |      |
| ARIC                   | 1036/2721 | 1.02 (0.96-1.09) | 0.46   |      | 1.04 (0.98-1.11) | 0.22  |      | 1.02 (0.96-1.09) | 0.51   |      | 0.99 (0.93-1.05) | 0.7    |      | 1.02 (0.96-1.09) | 0.38   |      |
| Replication combined   | 1665/6359 | 1.01 (0.96-1.06) | 0.73   | 0.68 | 1.02 (0.97-1.07) | 0.43  | 0.55 | 1.00 (0.95-1.06) | 0.94   | 0.41 | 0.96 (0.92-1.01) | 0.15   | 0.32 | 1.01 (0.96-1.06) | 0.69   | 0.67 |
| All combined           | 2032/9180 | 1.00 (0.95-1.04) | 0.86   | 0.53 | 1.00 (0.96-1.05) | 0.85  | 0.36 | 0.99 (0.94-1.04) | 0.61   | 0.32 | 0.97 (0.92-1.02) | 0.29   | 0.3  | 1.00 (0.95-1.04) | 0.91   | 0.53 |

Data are Hazard ratios (HRs) and 95% confidence intervals (85% CIs) of incident type 2 diabetes per SD increment of metabolite levels, after multivariate adjustment. Results were analyzed in each study and were combined using a fixed-effect meta-analysis.

Model 1: adjusted for age, sex, smoking, alcohol consumption, education, lipid-lowering medication use, anti-hypertensive medication use, family history of diabetes, self-reported physician-diagnosed hypertension, self-reported physician-diagnosed dyslipidemia, and other study-specific covariates as shown in Table S4.

Model 2: further adjusted for BMI and waist-to-hip ratio (in PREDIMED, waist circumference) based on Model 1.

Model 3: further adjusted for physical activity and AHEI-2010 (in WHI, HEI-2005) based on Model 1.

Model 4: further adjusted for HDL-C, LDL-C and triglycerides (in WHI, HDL-C and total cholesterol) based on Model 1.

Model 5: Further adjusted for systolic blood pressure and diastolic blood pressure based on Model 1.

Abbreviations: HCHS/SOL, the Hispanic Community Health Study/Study of Latinos; ARIC, the Atherosclerosis Risk in Communities study; FHS, the Framingham Study; WHI, the Women's Health Initiative; PREDIMED, Prevención con Dieta Mediterránea; BMI, body mass index; WHR, waist-hip ratio; SBP, systolic blood pressure; DBP, diastolic blood pressure; AHEI-2010, alternate healthy eating index 2010; HEI-2005, healthy eating index 2005; HDL-C, high-density lipoprotein cholesterol; LDL-C, low-density lipoprotein cholesterol.

**Table S6 Genetic variants and loci associated with circulating tryptophan metabolites ( $P < 5.0E-08$ )**

| Metabolite        | SNP         | Locus                              | Chr | Position  | A1 | A2 | EAF (min/max) | N    | Effect | SE   | P       | Direction* | HetP    | Known biological function in tryptophan metabolism or transportation of tryptophan metabolites                               | Previously reported GWAS loci associated with any tryptophan metabolites                       |
|-------------------|-------------|------------------------------------|-----|-----------|----|----|---------------|------|--------|------|---------|------------|---------|------------------------------------------------------------------------------------------------------------------------------|------------------------------------------------------------------------------------------------|
| <b>Tryptophan</b> |             |                                    |     |           |    |    |               |      |        |      |         |            |         |                                                                                                                              |                                                                                                |
|                   | rs4691944   | <i>TDO2</i>                        | 4   | 156753174 | T  | C  | 0.87/0.97     | 9016 | 0.16   | 0.02 | 1.3E-10 | ++++       | 1.8E-02 | <i>TDO2</i> encodes tryptophan 2,3-dioxygenase which catalyzes tryptophan to kynurenine                                      | Tryptophan [Shin et al. Nature Genetics, 2014]                                                 |
|                   | rs12207199  | <i>SLC16A10</i>                    | 6   | 111525906 | A  | T  | 0.03/0.17     | 9016 | 0.12   | 0.02 | 4.7E-08 | +++        | 1.5E-01 | <i>SLC16A10</i> encodes aromatic amino acid transporter 1 which transports tryptophan, tyrosine and phenylalanine            | Tryptophan [Shin et al. Nature Genetics, 2014]                                                 |
|                   | rs402014    | <i>SLC16A10</i>                    | 6   | 111527696 | T  | C  | 0.50/0.57     | 9016 | -0.08  | 0.01 | 1.2E-08 | ----       | 9.7E-01 |                                                                                                                              |                                                                                                |
|                   | rs186903200 | <i>FSIP1</i>                       | 15  | 40007123  | C  | G  | 0.01/0.01     | 1772 | 0.90   | 0.16 | 2.3E-08 | ?+??       | NA      |                                                                                                                              |                                                                                                |
| <b>Serotonin</b>  |             |                                    |     |           |    |    |               |      |        |      |         |            |         |                                                                                                                              |                                                                                                |
|                   | rs7451008   | <i>CDKAL1</i>                      | 6   | 20673880  | T  | C  | 0.73/0.78     | 7214 | 0.10   | 0.02 | 2.2E-08 | +++?       | 4.7E-01 |                                                                                                                              | Xanthurenate (gene level; $P=5e-6$ ; Rhee et al. Cell Metabolism, 2013]                        |
|                   | rs662138    | <i>SLC22A1</i>                     | 6   | 160564476 | C  | G  | 0.79/0.93     | 9012 | -0.16  | 0.02 | 1.6E-13 | ----       | 1.5E-01 | <i>SLC22A1</i> encodes organic cationic transporter 1 which plays a significant role in hepatic elimination of serotonin     |                                                                                                |
|                   | rs4734879   | <i>ZFPM2</i>                       | 8   | 106583124 | A  | G  | 0.60/0.71     | 9012 | 0.09   | 0.02 | 4.8E-08 | ++++       | 2.6E-01 |                                                                                                                              |                                                                                                |
|                   | rs11213820  | <i>Clorf53-COLCA1</i> <sup>n</sup> | 11  | 111160491 | T  | C  | 0.24/0.36     | 7214 | 0.10   | 0.02 | 3.2E-08 | +++?       | 7.9E-01 |                                                                                                                              |                                                                                                |
| <b>Kynurenine</b> |             |                                    |     |           |    |    |               |      |        |      |         |            |         |                                                                                                                              |                                                                                                |
|                   | rs76506135  | <i>IDO1-IDO2</i>                   | 8   | 39770319  | T  | C  | 0.01/0.06     | 5705 | -0.33  | 0.06 | 1.7E-08 | --??       | 2.9E-01 | <i>IDO1</i> and <i>IDO2</i> encode the two indoleamine 2,3-dioxygenase isozymes which both catalyze tryptophan to kynurenine | Hydroxytryptophan [Shin et al. Nature Genetics, 2014]                                          |
|                   | rs2729456   | <i>IDO1-IDO2</i>                   | 8   | 39819808  | T  | G  | 0.59/0.71     | 8669 | 0.12   | 0.02 | 1.8E-15 | ++++       | 4.9E-01 |                                                                                                                              |                                                                                                |
|                   | rs3184504   | <i>SH2B3</i>                       | 12  | 111884608 | T  | C  | 0.10/0.50     | 8669 | 0.10   | 0.02 | 4.5E-08 | ++++       | 9.8E-01 |                                                                                                                              | Kynurenine [Shin et al. Nature Genetics, 2014]                                                 |
|                   | rs4419070   | <i>SLC7A5</i>                      | 16  | 87863267  | T  | C  | 0.04/0.15     | 8669 | 0.18   | 0.03 | 7.1E-12 | ++++       | 4.3E-01 | <i>SLC7A5</i> encodes L-type amino acid transporter 1 (LAT1) which mediates tryptophan/kynurenine exchange                   | Kynurenine [Shin et al. Nature Genetics, 2014]; Kynurenine [Long et al. Nature Genetics, 2017] |
|                   | rs8063871   | <i>SLC7A5</i>                      | 16  | 87863500  | A  | C  | 0.60/0.74     | 8669 | 0.12   | 0.02 | 4.4E-13 | ++++       | 5.1E-02 |                                                                                                                              |                                                                                                |
|                   | rs8050771   | <i>SLC7A5</i>                      | 16  | 87878570  | A  | G  | 0.26/0.43     | 8669 | 0.19   | 0.02 | 2.2E-30 | ++++       | 1.4E-01 |                                                                                                                              |                                                                                                |
| <b>Kynurenate</b> |             |                                    |     |           |    |    |               |      |        |      |         |            |         |                                                                                                                              |                                                                                                |
|                   | rs4648727   | <i>GNB1</i>                        | 1   | 1776269   | A  | C  | 0.35/0.45     | 5735 | 0.11   | 0.02 | 1.9E-08 | +??+       | 4.3E-01 |                                                                                                                              |                                                                                                |



|                      |             |                     |    |           |   |   |           |      |       |      |         |      |         |                                                                                                                                                                          |                                                                                                          |
|----------------------|-------------|---------------------|----|-----------|---|---|-----------|------|-------|------|---------|------|---------|--------------------------------------------------------------------------------------------------------------------------------------------------------------------------|----------------------------------------------------------------------------------------------------------|
|                      | rs61825638  | <i>KMO</i>          | 1  | 241713402 | T | C | 0.19/0.19 | 3933 | 0.37  | 0.03 | 1.2E-37 | +??? | NA      | <i>KMO</i> encodes Kynurenine 3-monooxygenase which catalyzes Kynurenine to hydroxykynurenine                                                                            | Kynurenate [Long et al. Nature Genetics, 2017]                                                           |
|                      | rs6429281   | <i>KMO</i>          | 1  | 241749007 | T | C | 0.16/0.16 | 3933 | 0.18  | 0.03 | 2.7E-09 | +??? | NA      |                                                                                                                                                                          |                                                                                                          |
|                      | rs11733850  | <i>AADAT</i>        | 4  | 171023301 | T | C | 0.06/0.11 | 5735 | 0.22  | 0.04 | 1.2E-09 | +??+ | 1.1E-01 | <i>AADAT</i> encodes kynurenine/alpha-aminoadipate aminotransferase                                                                                                      |                                                                                                          |
| <b>Xanthurenate</b>  |             |                     |    |           |   |   |           |      |       |      |         |      |         |                                                                                                                                                                          |                                                                                                          |
|                      | rs887829    | <i>UGT1A</i>        | 2  | 234668570 | T | C | 0.31/0.33 | 5386 | 0.17  | 0.02 | 1.5E-19 | +??+ | 7.7E-02 |                                                                                                                                                                          | Xanthurenate [Rhee et al. Cell Metabolism, 2013]                                                         |
|                      | rs10145643  | <i>SLC10A1</i>      | 14 | 70252470  | A | G | 0.72/0.72 | 3933 | -0.13 | 0.02 | 6.9E-09 | -??? | NA      |                                                                                                                                                                          |                                                                                                          |
| <b>Quinolinate</b>   |             |                     |    |           |   |   |           |      |       |      |         |      |         |                                                                                                                                                                          |                                                                                                          |
|                      | rs10496731  | <i>ACMSD</i>        | 2  | 135597628 | T | G | 0.38/0.51 | 5388 | 0.12  | 0.02 | 3.6E-10 | +??+ | 6.0E-01 | <i>ACMSD</i> encodes aminocarboxymuconate-semialdehyde decarboxylase which limits and regulates the formation of quinolinate                                             | N1-methyl-3-pyridone-4-carboxamide, an endproduct of NAD degradation [Shin et al. Nature Genetics, 2014] |
|                      | rs62513117  | <i>IDO1-IDO2</i>    | 8  | 39812141  | A | G | 0.74/0.74 | 3933 | 0.16  | 0.03 | 7.3E-10 | +??? | NA      | This SNP is in LD (r=0.37 in CEU, 0.21 in AA, and 0.61 in HA) with the kynurenine-associated SNP rs2729456 at the <i>IDO1-IDO2</i> locus (see biological function above) | Hydroxytryptophan [Shin et al. Nature Genetics, 2014]                                                    |
| <b>Picolinate</b>    |             |                     |    |           |   |   |           |      |       |      |         |      |         |                                                                                                                                                                          |                                                                                                          |
|                      | rs80093546  | <i>CUL1</i>         | 7  | 148433716 | G | T | 0.99      | 3933 | 0.64  | 0.12 | 3.7E-08 | +??? | NA      |                                                                                                                                                                          |                                                                                                          |
|                      | rs7499271   | <i>ACSM1-ACSM2B</i> | 16 | 20555259  | T | A | 0.09      | 3933 | 0.53  | 0.04 | 2.2E-46 | +??? | NA      |                                                                                                                                                                          |                                                                                                          |
|                      | rs200661965 | <i>ACSM1-ACSM2B</i> | 16 | 20585003  | C | T | 0.12      | 3933 | -0.19 | 0.03 | 1.2E-09 | -??? | NA      |                                                                                                                                                                          |                                                                                                          |
|                      | rs368315271 | <i>ACSM1-ACSM2B</i> | 16 | 20587526  | T | C | 0.03      | 3933 | 0.43  | 0.06 | 1.8E-11 | +??? | NA      |                                                                                                                                                                          |                                                                                                          |
|                      | rs4105168   | <i>ACSM1-ACSM2B</i> | 16 | 20633414  | G | C | 0.12      | 3933 | 0.34  | 0.04 | 9.0E-21 | +??? | NA      |                                                                                                                                                                          |                                                                                                          |
|                      | rs55689267  | <i>ACSM1-ACSM2B</i> | 16 | 20681700  | T | C | 0.99      | 3933 | -0.74 | 0.10 | 4.7E-13 | -??? | NA      |                                                                                                                                                                          |                                                                                                          |
|                      | rs9924430   | <i>SCNN1B</i>       | 16 | 23387698  | C | T | 0.05      | 3933 | 0.29  | 0.05 | 3.0E-08 | +??? | NA      |                                                                                                                                                                          |                                                                                                          |
|                      | rs11641469  | <i>CDK10</i>        | 16 | 89745421  | A | G | 0.59      | 3933 | 0.15  | 0.02 | 7.6E-12 | +??? | NA      |                                                                                                                                                                          |                                                                                                          |
| <b>Indoleacetate</b> |             |                     |    |           |   |   |           |      |       |      |         |      |         |                                                                                                                                                                          |                                                                                                          |
|                      | rs191814634 | <i>SEPHS2P1</i>     | 5  | 14957733  | C | G | 0.91/0.99 | 7214 | -0.26 | 0.04 | 1.1E-08 | ---? | 6.7E-01 |                                                                                                                                                                          |                                                                                                          |
|                      | rs11575302  | <i>DDC</i>          | 7  | 50607694  | A | G | 0.02/0.15 | 7214 | -0.21 | 0.04 | 1.7E-08 | ---? | 2.2E-01 | <i>DDC</i> encodes dopa decarboxylase which converts tryptophan to tryptamine, and tryptamine can be further                                                             | Indoleacetate [Shin et al. Nature Genetics, 2014]                                                        |

|                         |                  |                       |           |                  |          |          |                  |             |              |             |                |             |                |                                                                                                                                                        |                                                                                                   |  |
|-------------------------|------------------|-----------------------|-----------|------------------|----------|----------|------------------|-------------|--------------|-------------|----------------|-------------|----------------|--------------------------------------------------------------------------------------------------------------------------------------------------------|---------------------------------------------------------------------------------------------------|--|
|                         |                  |                       |           |                  |          |          |                  |             |              |             |                |             |                |                                                                                                                                                        | metabolized to indoleacetate                                                                      |  |
| <b>Indolelactate</b>    |                  |                       |           |                  |          |          |                  |             |              |             |                |             |                |                                                                                                                                                        |                                                                                                   |  |
|                         | rs148756272      | <i>PKN3</i>           | 9         | 131480262        | T        | C        | 0.01/0.07        | 5705        | 0.32         | 0.06        | 2.3E-08        | ++??        | 1.5E-01        |                                                                                                                                                        |                                                                                                   |  |
|                         | <b>rs7875300</b> | <b><i>KYAT1</i></b>   | <b>9</b>  | <b>131573261</b> | <b>A</b> | <b>G</b> | <b>0.25/0.45</b> | <b>7214</b> | <b>-0.15</b> | <b>0.02</b> | <b>1.9E-16</b> | <b>---?</b> | <b>5.9E-01</b> | <i>KYAT1</i> encodes kynurenine aminotransferase 1 which converts tryptophan to indolepyruvate, and indolepyruvate is then converted to indolelactate. | Indolelactate [Shin et al. Nature Genetics, 2014]; Indolelactate [Yu et al. Genome Biology, 2016] |  |
| <b>Indolepropionate</b> |                  |                       |           |                  |          |          |                  |             |              |             |                |             |                |                                                                                                                                                        |                                                                                                   |  |
|                         | <b>rs7570971</b> | <b><i>LCT</i></b>     | <b>2</b>  | <b>135837906</b> | <b>A</b> | <b>C</b> | <b>0.34/0.88</b> | <b>7214</b> | <b>0.18</b>  | <b>0.02</b> | <b>2.9E-18</b> | <b>+++?</b> | <b>7.4E-01</b> |                                                                                                                                                        |                                                                                                   |  |
|                         | rs72847650       | <i>HNRNPKP2-UBBP1</i> | 2         | 137051974        | A        | C        | 0.09/0.43        | 7214        | -0.13        | 0.02        | 1.6E-08        | ---?        | 4.2E-01        |                                                                                                                                                        |                                                                                                   |  |
|                         | rs149241657      | <i>ACSM5</i>          | 16        | 20448142         | A        | G        | 0.91/0.97        | 7214        | 0.26         | 0.04        | 4.3E-09        | +++?        | 7.2E-01        |                                                                                                                                                        |                                                                                                   |  |
|                         | rs59261767       | <i>ACSM2A</i>         | 16        | 20477004         | T        | C        | 0.01/0.03        | 5705        | 0.45         | 0.07        | 9.2E-12        | ++??        | 6.5E-02        |                                                                                                                                                        |                                                                                                   |  |
|                         | rs6497490        | <i>ACSM2A</i>         | 16        | 20477474         | T        | G        | 0.87/0.96        | 8652        | -0.22        | 0.03        | 1.6E-15        | ----        | 7.5E-01        |                                                                                                                                                        |                                                                                                   |  |
|                         | <b>rs1505100</b> | <b><i>ACSM2A</i></b>  | <b>16</b> | <b>20481672</b>  | <b>A</b> | <b>T</b> | <b>0.48/0.71</b> | <b>8652</b> | <b>0.15</b>  | <b>0.02</b> | <b>5.6E-22</b> | <b>++++</b> | <b>2.4E-01</b> |                                                                                                                                                        | Indolepropionate [Shin et al. Nature Genetics, 2014]                                              |  |
| <b>Indoxylsulfate</b>   |                  |                       |           |                  |          |          |                  |             |              |             |                |             |                |                                                                                                                                                        |                                                                                                   |  |
|                         | rs80303567       | <i>LINC01082</i>      | 16        | 86194834         | C        | G        | 0.01/0.04        | 5705        | -0.404       | 0.07        | 8.9E-09        | --??        | 5.6E-01        |                                                                                                                                                        |                                                                                                   |  |

Lead SNPs at each locus at genome-wide significance ( $P < 4.5E-9$ ) are highlighted in bold.

\*Direction indicates association directions for HCHS/ SOL Hispanics/Latinos, ARIC African Americans, ARIC Whites, and FHS Whites, orderly. +, positive association, -, inverse association, ?, data not available.

Abbreviations: Chr, chromosome; A1, effect allele; A2, reference allele; EAF, effect allele frequency; HetP, P for heterogeneity.

**Table S7 Estimated genetic heritability, genetic correlation with type 2 diabetes, and potential causal relationship with type 2 diabetes, for each tryptophan metabolite**

| Metabolites      | Current study                   |       |       | Shin et al. Nature Genetics, 2014                  |                                         | Long et al. Nature Genetics, 2017                  |                                         | LCV models†         |       |       |       |                        |       |       |
|------------------|---------------------------------|-------|-------|----------------------------------------------------|-----------------------------------------|----------------------------------------------------|-----------------------------------------|---------------------|-------|-------|-------|------------------------|-------|-------|
|                  | SNP-based genetic heritability* |       |       | Heritability estimated by the classical twin model | Explained heritability by GWAS variants | Heritability estimated by the classical twin model | Explained heritability by GWAS variants | Causal relationship |       |       |       | h <sup>2</sup> Z-score |       |       |
|                  | h <sup>2</sup>                  | SE    | P     |                                                    |                                         |                                                    |                                         | r <sub>g</sub>      | GCP   | SE    | P     | Metabolite             | T2D   |       |
| Tryptophan       | 0.019                           | 0.041 | 0.64  | 0.387                                              | 0.023                                   | 0.31                                               | NA                                      | NA                  | NA    | NA    | NA    | 1.4                    | 107.2 |       |
| Serotonin        | 0.130                           | 0.049 | 0.008 | 0.331                                              | NA                                      | NA                                                 | NA                                      | -                   | 0.062 | 0.057 | 0.287 | 0.51                   | 14.6  | 107.1 |
| Kynurenine       | 0.074                           | 0.048 | 0.12  | 0.433                                              | 0.065                                   | 0.60                                               | 0.025                                   | 0.006               | 0.365 | 0.378 | 0.62  |                        | 7.1   | 107.2 |
| Kynurenate       | 0.000                           | 0.073 | 0.81  | NA                                                 | NA                                      | 0.62                                               | 0.034                                   | NA                  | NA    | NA    | NA    |                        | NA    | NA    |
| Xanthurenate     | 0.070                           | 0.080 | 0.39  | NA                                                 | NA                                      | 0.46                                               | NA                                      | NA                  | NA    | NA    | NA    |                        | 4.6   | 105.7 |
| Quinolate        | 0.000                           | 0.084 | 0.87  | NA                                                 | NA                                      | 0.25                                               | NA                                      | NA                  | NA    | NA    | NA    |                        | NA    | NA    |
| Picolinate       | 0.064                           | 0.116 | 0.58  | NA                                                 | NA                                      | NA                                                 | NA                                      | NA                  | NA    | NA    | NA    |                        | 2.3   | 105.7 |
| Indoleacetate    | 0.019                           | 0.058 | 0.74  | 0.235                                              | NA                                      | NA                                                 | NA                                      | NA                  | NA    | NA    | NA    |                        | 1.6   | 106.1 |
| Indolelactate    | 0.000                           | 0.048 | 0.21  | 0.306                                              | 0.016                                   | 0.63                                               | NA                                      | NA                  | NA    | NA    | NA    |                        | NA    | NA    |
| Indolepropionate | 0.107                           | 0.058 | 0.06  | 0.302                                              | 0.043                                   | 0.46                                               | 0.019                                   | -                   | 0.207 | 0.757 | 0.153 | 1.6E-24                | 8.0   | 107.2 |
| Indoxyl sulfate  | 0.039                           | 0.042 | 0.36  | 0.248                                              | NA                                      | 0.30                                               | NA                                      | NA                  | NA    | NA    | NA    |                        | 3.7   | 107.2 |

\*SNP-based genetic heritability (h<sup>2</sup>) and genetic correlations (r<sub>g</sub>) were estimated using linkage disequilibrium score regression.

†Causal relationship was estimated using latent causal variable (LCV) models that estimate causality while accounting for horizontal pleiotropy. Genetic causality proportion (GCP) >0.6 suggests nearly full genetic causality. LCV were applied when the h<sup>2</sup> Z-score of exposure and outcome both ≥7, otherwise the causal relationship will be overestimated. As such, causal relationship was tested for serotonin, kynurenine, and indolepropionate with T2D. The 3 metabolites with h<sup>2</sup>=0 (kynurenate, quinolate, and indolelactate) and the other 5 metabolites with h<sup>2</sup> Z-score <7 from LCV (tryptophan, xanthurenate, picolinate, indoleacetate, indoxyl sulfate) were not tested for their causal relationships with T2D.

**Table S8 Associations of 10 major food groups with serum tryptophan metabolites**

|                | Tryptophan |       |                | Serotonin |       |                | Kynurenine |       |                | Kynurenate |       |                | Xanthurenate |       |                | Quinolate |       |                |
|----------------|------------|-------|----------------|-----------|-------|----------------|------------|-------|----------------|------------|-------|----------------|--------------|-------|----------------|-----------|-------|----------------|
|                | Beta       | SE    | <i>P</i>       | Beta      | SE    | <i>P</i>       | Beta       | SE    | <i>P</i>       | Beta       | SE    | <i>P</i>       | Beta         | SE    | <i>P</i>       | Beta      | SE    | <i>P</i>       |
| <b>Model 1</b> |            |       |                |           |       |                |            |       |                |            |       |                |              |       |                |           |       |                |
| Vegetable      | 0.00       | 0.02  | 8.7E-01        | 0.08      | 0.02  | <b>1.3E-03</b> | -0.06      | 0.02  | <b>5.8E-03</b> | 0.02       | 0.02  | 5.1E-01        | 0.00         | 0.02  | 9.3E-01        | -0.11     | 0.02  | <b>4.6E-06</b> |
| Fruit          | 0.01       | 0.02  | 6.0E-01        | 0.08      | 0.02  | <b>5.7E-04</b> | -0.07      | 0.02  | <b>2.6E-03</b> | -0.11      | 0.02  | <b>8.6E-06</b> | -0.08        | 0.02  | <b>3.6E-04</b> | -0.09     | 0.02  | <b>5.5E-04</b> |
| Nut and legume | 0.00       | 0.05  | 9.7E-01        | 0.17      | 0.06  | <b>2.4E-03</b> | -0.12      | 0.06  | 3.1E-02        | -0.14      | 0.06  | <b>1.1E-02</b> | -0.08        | 0.05  | 1.4E-01        | -0.28     | 0.06  | <b>1.0E-06</b> |
| Whole grain    | 0.01       | 0.02  | 4.7E-01        | 0.06      | 0.02  | <b>4.4E-04</b> | -0.05      | 0.02  | <b>2.5E-03</b> | -0.05      | 0.02  | <b>2.5E-03</b> | -0.01        | 0.02  | 3.4E-01        | -0.04     | 0.02  | <b>1.4E-02</b> |
| Refined grain  | -0.01      | 0.02  | 6.1E-01        | -0.05     | 0.02  | <b>3.8E-03</b> | 0.03       | 0.02  | 6.9E-02        | 0.03       | 0.02  | 1.6E-01        | -0.01        | 0.02  | 6.6E-01        | 0.07      | 0.02  | <b>4.9E-05</b> |
| Red meat       | 0.03       | 0.06  | 5.9E-01        | -0.14     | 0.07  | 3.5E-02        | 0.17       | 0.07  | <b>1.0E-02</b> | 0.35       | 0.07  | <b>9.9E-08</b> | 0.17         | 0.06  | <b>6.7E-03</b> | 0.16      | 0.07  | <b>1.8E-02</b> |
| Poultry        | 0.000      | 0.002 | 8.1E-01        | 0.000     | 0.002 | 8.6E-01        | -0.004     | 0.002 | 3.6E-02        | 0.000      | 0.002 | 8.2E-01        | 0.003        | 0.002 | 7.3E-02        | -0.006    | 0.002 | <b>6.6E-03</b> |
| Fish           | -0.11      | 0.12  | 3.7E-01        | 0.16      | 0.13  | 2.1E-01        | -0.25      | 0.13  | 4.8E-02        | 0.01       | 0.13  | 9.2E-01        | -0.02        | 0.12  | 8.6E-01        | -0.27     | 0.13  | 4.4E-02        |
| Egg            | -0.03      | 0.02  | 7.7E-02        | 0.01      | 0.02  | 4.8E-01        | -0.02      | 0.02  | 3.5E-01        | 0.01       | 0.02  | 4.4E-01        | 0.01         | 0.02  | 3.9E-01        | 0.03      | 0.02  | 1.2E-01        |
| Dairy          | 0.08       | 0.03  | <b>8.5E-03</b> | 0.00      | 0.03  | 9.7E-01        | 0.05       | 0.03  | 1.3E-01        | -0.01      | 0.03  | 7.6E-01        | 0.04         | 0.03  | 2.4E-01        | 0.12      | 0.03  | <b>3.2E-04</b> |
| <b>Model 2</b> |            |       |                |           |       |                |            |       |                |            |       |                |              |       |                |           |       |                |
| Vegetable      | 0.02       | 0.03  | 4.4E-01        | 0.06      | 0.03  | 5.6E-02        | -0.04      | 0.03  | 1.6E-01        | 0.08       | 0.03  | 7.3E-03        | 0.05         | 0.03  | 6.2E-02        | -0.09     | 0.03  | 7.3E-03        |
| Fruit          | 0.01       | 0.02  | 7.0E-01        | 0.06      | 0.03  | 2.6E-02        | -0.05      | 0.03  | 6.2E-02        | -0.10      | 0.03  | 1.0E-04        | -0.10        | 0.02  | 1.2E-04        | -0.03     | 0.03  | 2.7E-01        |
| Nut and legume | 0.01       | 0.06  | 7.9E-01        | 0.12      | 0.06  | 3.8E-02        | -0.08      | 0.06  | 2.0E-01        | -0.07      | 0.06  | 2.1E-01        | -0.03        | 0.06  | 5.4E-01        | -0.22     | 0.06  | 3.3E-04        |
| Whole grain    | 0.01       | 0.02  | 6.7E-01        | 0.04      | 0.02  | 8.4E-02        | -0.04      | 0.02  | 3.3E-02        | -0.04      | 0.02  | 5.0E-02        | -0.02        | 0.02  | 3.6E-01        | 0.01      | 0.02  | 8.0E-01        |
| Refined grain  | 0.00       | 0.02  | 9.3E-01        | 0.00      | 0.02  | 9.9E-01        | -0.02      | 0.02  | 4.4E-01        | -0.03      | 0.02  | 1.7E-01        | -0.04        | 0.02  | 3.8E-02        | 0.05      | 0.02  | 3.9E-02        |
| Red meat       | 0.06       | 0.07  | 3.7E-01        | -0.04     | 0.07  | 5.7E-01        | 0.06       | 0.07  | 4.1E-01        | 0.29       | 0.07  | 8.1E-05        | 0.18         | 0.07  | 8.6E-03        | 0.04      | 0.07  | 5.7E-01        |
| Poultry        | 0.001      | 0.002 | 8.0E-01        | -0.001    | 0.002 | 8.0E-01        | -0.003     | 0.002 | 1.7E-01        | 0.002      | 0.002 | 3.8E-01        | 0.006        | 0.002 | 6.1E-03        | -0.004    | 0.002 | 5.8E-02        |
| Fish           | -0.08      | 0.12  | 5.1E-01        | 0.09      | 0.13  | 5.1E-01        | -0.17      | 0.13  | 2.0E-01        | 0.08       | 0.13  | 5.4E-01        | 0.04         | 0.12  | 7.6E-01        | -0.15     | 0.13  | 2.6E-01        |
| Egg            | -0.02      | 0.02  | 1.2E-01        | 0.02      | 0.02  | 3.5E-01        | -0.02      | 0.02  | 3.1E-01        | 0.01       | 0.02  | 5.8E-01        | 0.01         | 0.02  | 5.6E-01        | 0.03      | 0.02  | 1.0E-01        |
| Dairy          | 0.08       | 0.03  | 1.0E-02        | 0.01      | 0.03  | 7.8E-01        | 0.04       | 0.03  | 2.5E-01        | 0.00       | 0.03  | 9.4E-01        | 0.05         | 0.03  | 1.1E-01        | 0.10      | 0.03  | 4.1E-03        |

Data are differences (beta) and standard error (SE) in metabolites associated with one serving/day intake of food groups.

Model 1, adjusted for age, gender, center, smoking, physical activity, education, income, and total energy intake. P-values remained significant after FDR correction are highlight in bold.

Model 2, further adjusted for other food groups based on Model 1 (all 10 food groups were included in the model simultaneously). FDR correction was not applied in this model.

**Table S8 Associations of 10 major food groups with serum tryptophan metabolites (continued)**

|                | Quinolinate |       |                | Picolinate |       |                | Indoleacetate |       |                | indolelactate |       |                | indolepropionate |       |                | Indoxyl sulfate |       |                |
|----------------|-------------|-------|----------------|------------|-------|----------------|---------------|-------|----------------|---------------|-------|----------------|------------------|-------|----------------|-----------------|-------|----------------|
|                | Beta        | SE    | <i>P</i>       | Beta       | SE    | <i>P</i>       | Beta          | SE    | <i>P</i>       | Beta          | SE    | <i>P</i>       | Beta             | SE    | <i>P</i>       | Beta            | SE    | <i>P</i>       |
| <b>Model 1</b> |             |       |                |            |       |                |               |       |                |               |       |                |                  |       |                |                 |       |                |
| Vegetable      | -0.11       | 0.02  | <b>4.6E-06</b> | 0.00       | 0.02  | 9.9E-01        | -0.03         | 0.02  | 2.0E-01        | -0.01         | 0.02  | 6.5E-01        | 0.17             | 0.02  | <b>3.3E-13</b> | -0.11           | 0.02  | <b>9.1E-06</b> |
| Fruit          | -0.09       | 0.02  | <b>5.5E-04</b> | -0.02      | 0.02  | 3.3E-01        | -0.09         | 0.02  | <b>4.4E-04</b> | -0.06         | 0.02  | <b>1.3E-02</b> | 0.31             | 0.02  | <b>6.1E-39</b> | -0.12           | 0.02  | <b>6.9E-07</b> |
| Nut and legume | -0.28       | 0.06  | <b>1.0E-06</b> | -0.11      | 0.05  | 4.9E-02        | -0.02         | 0.06  | 7.3E-01        | -0.01         | 0.05  | 8.5E-01        | 0.47             | 0.06  | <b>6.7E-17</b> | -0.30           | 0.06  | <b>2.8E-07</b> |
| Whole grain    | -0.04       | 0.02  | <b>1.4E-02</b> | -0.02      | 0.02  | 3.2E-01        | 0.04          | 0.02  | <b>1.8E-02</b> | -0.06         | 0.02  | <b>2.7E-04</b> | 0.16             | 0.02  | <b>2.0E-22</b> | -0.07           | 0.02  | <b>1.1E-04</b> |
| Refined grain  | 0.07        | 0.02  | <b>4.9E-05</b> | -0.01      | 0.02  | 6.1E-01        | -0.01         | 0.02  | 7.0E-01        | 0.01          | 0.02  | 3.7E-01        | -0.12            | 0.02  | <b>5.8E-11</b> | 0.03            | 0.02  | 6.7E-02        |
| Red meat       | 0.16        | 0.07  | <b>1.8E-02</b> | 0.16       | 0.06  | <b>9.1E-03</b> | -0.03         | 0.07  | 7.0E-01        | 0.09          | 0.06  | 1.2E-01        | -0.64            | 0.07  | <b>1.5E-22</b> | 0.12            | 0.07  | 6.8E-02        |
| Poultry        | -0.006      | 0.002 | <b>6.6E-03</b> | 0.005      | 0.002 | <b>1.4E-02</b> | 0.001         | 0.002 | 6.8E-01        | 0.002         | 0.002 | 2.7E-01        | -0.001           | 0.002 | <b>7.1E-01</b> | 0.010           | 0.002 | <b>5.8E-06</b> |
| Fish           | -0.27       | 0.13  | 4.4E-02        | 0.04       | 0.12  | 7.6E-01        | 0.07          | 0.13  | 6.2E-01        | -0.08         | 0.12  | 5.2E-01        | 0.28             | 0.13  | 2.8E-02        | 0.21            | 0.13  | 1.1E-01        |
| Egg            | 0.03        | 0.02  | 1.2E-01        | 0.01       | 0.02  | 5.0E-01        | 0.02          | 0.02  | 2.7E-01        | 0.01          | 0.02  | 6.9E-01        | -0.02            | 0.02  | 3.7E-01        | 0.02            | 0.02  | 3.2E-01        |
| Dairy          | 0.12        | 0.03  | <b>3.2E-04</b> | 0.05       | 0.03  | 1.0E-01        | 0.01          | 0.03  | 7.0E-01        | -0.06         | 0.03  | 3.7E-02        | 0.04             | 0.03  | 1.8E-01        | -0.03           | 0.03  | 3.2E-01        |
| <b>Model 2</b> |             |       |                |            |       |                |               |       |                |               |       |                |                  |       |                |                 |       |                |
| Vegetable      | -0.09       | 0.03  | 7.3E-03        | 0.06       | 0.03  | 3.8E-02        | -0.01         | 0.03  | 7.2E-01        | 0.01          | 0.03  | 6.9E-01        | 0.10             | 0.03  | 1.4E-03        | -0.11           | 0.03  | 5.5E-04        |
| Fruit          | -0.03       | 0.03  | 2.7E-01        | -0.03      | 0.03  | 2.1E-01        | -0.10         | 0.03  | 1.8E-04        | -0.06         | 0.02  | 1.7E-02        | 0.26             | 0.03  | 1.7E-24        | -0.12           | 0.03  | 5.7E-06        |
| Nut and legume | -0.22       | 0.06  | 3.3E-04        | -0.06      | 0.06  | 2.9E-01        | -0.03         | 0.06  | 6.2E-01        | 0.02          | 0.05  | 6.7E-01        | 0.31             | 0.06  | 9.3E-08        | -0.24           | 0.06  | 8.6E-05        |
| Whole grain    | 0.01        | 0.02  | 8.0E-01        | -0.02      | 0.02  | 4.2E-01        | 0.05          | 0.02  | 1.0E-02        | -0.07         | 0.02  | 4.0E-04        | 0.10             | 0.02  | 2.0E-07        | -0.04           | 0.02  | 7.0E-02        |
| Refined grain  | 0.05        | 0.02  | 3.9E-02        | -0.03      | 0.02  | 1.3E-01        | 0.00          | 0.02  | 9.9E-01        | -0.04         | 0.02  | 7.4E-02        | 0.05             | 0.02  | 1.5E-02        | -0.05           | 0.02  | 3.2E-02        |
| Red meat       | 0.04        | 0.07  | 5.7E-01        | 0.22       | 0.07  | 1.8E-03        | -0.01         | 0.07  | 8.9E-01        | 0.03          | 0.07  | 6.4E-01        | -0.41            | 0.07  | 8.6E-09        | 0.12            | 0.07  | 1.2E-01        |
| Poultry        | -0.004      | 0.002 | 5.8E-02        | 0.007      | 0.002 | 1.4E-03        | 0.002         | 0.002 | 3.3E-01        | 0.002         | 0.002 | 2.9E-01        | -0.006           | 0.002 | 4.3E-03        | 0.012           | 0.002 | 2.5E-07        |
| Fish           | -0.15       | 0.13  | 2.6E-01        | 0.07       | 0.13  | 5.9E-01        | 0.13          | 0.13  | 3.4E-01        | -0.08         | 0.12  | 5.3E-01        | 0.02             | 0.13  | 8.6E-01        | 0.32            | 0.13  | 1.6E-02        |
| Egg            | 0.03        | 0.02  | 1.0E-01        | 0.01       | 0.02  | 5.4E-01        | 0.01          | 0.02  | 4.4E-01        | 0.00          | 0.02  | 9.0E-01        | 0.00             | 0.02  | 9.3E-01        | 0.00            | 0.02  | 8.6E-01        |
| Dairy          | 0.10        | 0.03  | 4.1E-03        | 0.07       | 0.03  | 3.4E-02        | 0.01          | 0.03  | 7.5E-01        | -0.05         | 0.03  | 8.0E-02        | 0.04             | 0.03  | 2.1E-01        | -0.02           | 0.03  | 4.9E-01        |

Data are differences (beta) and standard error (SE) in metabolites associated with one serving/day intake of food groups.

Model 1, adjusted for age, gender, center, smoking, physical activity, education, income, and total energy intake. P-values remained significant after FDR correction are highlight in bold.

Model 2, further adjusted for other food groups based on Model 1 (all 10 food groups were included in the model simultaneously). FDR correction was not applied in this model.

**Table S9 Associations of dietary intakes of macronutrients, fiber and tryptophan with serum tryptophan metabolites**

|                | Tryptophan |       |                | Serotonin |       |                | Kynurenine |       |                | Kynurenate |       |                | Xanthurenate |       |                | Quinolate |       |                |
|----------------|------------|-------|----------------|-----------|-------|----------------|------------|-------|----------------|------------|-------|----------------|--------------|-------|----------------|-----------|-------|----------------|
|                | Beta       | SE    | <i>P-value</i> | Beta      | SE    | <i>P-value</i> | Beta       | SE    | <i>P-value</i> | Beta       | SE    | <i>P-value</i> | Beta         | SE    | <i>P-value</i> | Beta      | SE    | <i>P-value</i> |
| <b>Model 1</b> |            |       |                |           |       |                |            |       |                |            |       |                |              |       |                |           |       |                |
| Carbohydrate   | 0.002      | 0.001 | 5.8E-02        | 0.002     | 0.001 | 6.7E-02        | 0.001      | 0.001 | 6.4E-01        | -0.010     | 0.001 | 1.3E-14        | -0.009       | 0.001 | 8.0E-12        | 0.000     | 0.001 | 8.7E-01        |
| Protein        | 0.006      | 0.003 | 8.3E-02        | -0.002    | 0.004 | 5.3E-01        | -0.004     | 0.004 | 3.4E-01        | 0.022      | 0.004 | 2.6E-09        | 0.024        | 0.003 | 1.2E-12        | -0.004    | 0.004 | 2.9E-01        |
| Fat            | -0.008     | 0.004 | 4.3E-02        | -0.007    | 0.004 | 9.7E-02        | 0.004      | 0.004 | 3.1E-01        | 0.022      | 0.004 | 9.5E-07        | 0.009        | 0.004 | 3.2E-02        | 0.009     | 0.004 | 4.4E-02        |
| Fiber          | 0.005      | 0.007 | 4.8E-01        | 0.046     | 0.008 | 2.5E-09        | -0.037     | 0.008 | 1.2E-06        | -0.036     | 0.008 | 3.1E-06        | -0.021       | 0.007 | 4.4E-03        | -0.043    | 0.008 | 5.2E-08        |
| Tryptophan     | 0.706      | 0.291 | 1.5E-02        | -0.424    | 0.308 | 1.7E-01        | -0.092     | 0.309 | 7.7E-01        | 1.684      | 0.310 | 5.7E-08        | 1.803        | 0.290 | 5.3E-10        | -0.052    | 0.316 | 8.7E-01        |
| <b>Model 2</b> |            |       |                |           |       |                |            |       |                |            |       |                |              |       |                |           |       |                |
| Carbohydrate   | 0.006      | 0.002 | 1.1E-02        | -0.004    | 0.002 | 1.1E-01        | 0.009      | 0.003 | 3.3E-04        | -0.008     | 0.003 | 2.1E-03        | -0.012       | 0.002 | 8.7E-07        | 0.012     | 0.003 | 5.6E-06        |
| Fat            | 0.003      | 0.007 | 6.7E-01        | -0.005    | 0.007 | 5.0E-01        | 0.015      | 0.007 | 3.2E-02        | -0.004     | 0.007 | 6.1E-01        | -0.023       | 0.007 | 5.4E-04        | 0.025     | 0.007 | 6.4E-04        |
| Fiber          | -0.009     | 0.008 | 2.7E-01        | 0.053     | 0.009 | 7.6E-10        | -0.049     | 0.009 | 1.5E-08        | -0.023     | 0.009 | 7.4E-03        | -0.011       | 0.008 | 1.6E-01        | -0.055    | 0.009 | 6.1E-10        |
| Tryptophan     | 1.299      | 0.357 | 2.8E-04        | -0.948    | 0.377 | 1.2E-02        | 0.835      | 0.378 | 2.7E-02        | 1.037      | 0.379 | 6.3E-03        | 0.875        | 0.355 | 1.4E-02        | 1.086     | 0.387 | 5.0E-03        |

**Table S9 (continued)**

|                | Picolinate |       |                | Indoleacetate |       |                | indolelactate |       |                | indolepropionate |       |                | Indoxyl sulfate |       |                |
|----------------|------------|-------|----------------|---------------|-------|----------------|---------------|-------|----------------|------------------|-------|----------------|-----------------|-------|----------------|
|                | Beta       | SE    | <i>P-value</i> | Beta          | SE    | <i>P-value</i> | Beta          | SE    | <i>P-value</i> | Beta             | SE    | <i>P-value</i> | Beta            | SE    | <i>P-value</i> |
| <b>Model 1</b> |            |       |                |               |       |                |               |       |                |                  |       |                |                 |       |                |
| Carbohydrate   | -0.007     | 0.001 | 7.7E-09        | -0.005        | 0.001 | 7.8E-04        | -0.004        | 0.001 | 3.8E-03        | 0.014            | 0.001 | 4.3E-24        | -0.005          | 0.001 | 9.3E-04        |
| Protein        | 0.025      | 0.003 | 6.7E-13        | 0.011         | 0.004 | 2.1E-03        | 0.005         | 0.003 | 1.4E-01        | -0.008           | 0.004 | 3.6E-02        | 0.012           | 0.004 | 1.1E-03        |
| Fat            | 0.009      | 0.004 | 2.9E-02        | 0.009         | 0.004 | 4.3E-02        | 0.001         | 0.004 | 8.8E-01        | -0.039           | 0.004 | 7.0E-19        | 0.008           | 0.005 | 8.9E-02        |
| Fiber          | -0.010     | 0.007 | 1.8E-01        | -0.001        | 0.008 | 9.1E-01        | -0.022        | 0.007 | 2.2E-03        | 0.124            | 0.007 | 7.2E-60        | -0.057          | 0.008 | 5.2E-13        |
| Tryptophan     | 1.853      | 0.295 | 4.0E-10        | 0.996         | 0.314 | 1.5E-03        | 0.515         | 0.282 | 6.8E-02        | -0.593           | 0.310 | 5.6E-02        | 0.874           | 0.317 | 5.9E-03        |
| <b>Model 2</b> |            |       |                |               |       |                |               |       |                |                  |       |                |                 |       |                |
| Carbohydrate   | -0.008     | 0.002 | 7.8E-04        | -0.004        | 0.003 | 1.1E-01        | -0.007        | 0.002 | 3.4E-03        | 0.003            | 0.002 | 1.8E-01        | 0.001           | 0.003 | 8.1E-01        |
| Fat            | -0.013     | 0.007 | 6.2E-02        | 0.000         | 0.007 | 9.6E-01        | -0.020        | 0.007 | 2.2E-03        | -0.007           | 0.007 | 3.4E-01        | -0.006          | 0.007 | 4.4E-01        |
| Fiber          | -0.002     | 0.008 | 7.8E-01        | 0.007         | 0.009 | 4.5E-01        | -0.019        | 0.008 | 1.4E-02        | 0.114            | 0.008 | 1.8E-40        | -0.064          | 0.009 | 6.0E-13        |
| Tryptophan     | 1.164      | 0.363 | 1.4E-03        | 0.584         | 0.387 | 1.3E-01        | 0.061         | 0.346 | 8.6E-01        | -0.601           | 0.368 | 1.0E-01        | 1.179           | 0.387 | 2.3E-03        |

Data are differences (beta) and standard error (SE) in metabolites associated with g/day intake of nutrients/1000 kcal energy.

Model 1, adjusted for age, gender, center, smoking, physical activity, education, income, and total energy intake.

Model 2, further adjusted for other nutrients based on Model 1 (Dietary carbohydrate, fat, fiber and tryptophan were included in the model simultaneously). As dietary protein intake was highly correlated with dietary tryptophan intake ( $r=0.9$ ), it was not included in this model.

**Table S10 Associations of gut bacterial taxa with serum levels of 4 indole metabolites**

| Phylum         | Genus                  | Prevalence | Relative abundance (%) | Indolepropionate |       |                | indolelactate |       |          | indoleacetate |       |                | Indoxyl sulfate |       |                |
|----------------|------------------------|------------|------------------------|------------------|-------|----------------|---------------|-------|----------|---------------|-------|----------------|-----------------|-------|----------------|
|                |                        |            |                        | Beta             | SE    | <i>P</i>       | Beta          | SE    | <i>P</i> | Beta          | SE    | <i>P</i>       | Beta            | SE    | <i>P</i>       |
| Firmicutes     | Ruminococcus           | 1.000      | 1.876                  | 0.117            | 0.028 | <b>2.6E-05</b> | 0.018         | 0.026 | 5.0E-01  | 0.026         | 0.030 | 3.9E-01        | 0.041           | 0.030 | 1.6E-01        |
| Firmicutes     | Flavonifractor         | 1.000      | 0.310                  | -0.091           | 0.021 | <b>2.8E-05</b> | 0.019         | 0.020 | 3.5E-01  | -0.043        | 0.023 | 6.6E-02        | 0.034           | 0.023 | 1.4E-01        |
| Firmicutes     | Faecalitalea           | 1.000      | 0.065                  | 0.154            | 0.037 | <b>3.0E-05</b> | -0.004        | 0.035 | 9.0E-01  | 0.052         | 0.040 | 1.9E-01        | 0.113           | 0.039 | <b>4.0E-03</b> |
| Firmicutes     | Lachnoclostridium      | 1.000      | 0.571                  | -0.146           | 0.037 | <b>7.1E-05</b> | 0.043         | 0.035 | 2.1E-01  | 0.018         | 0.039 | 6.4E-01        | 0.073           | 0.039 | 6.3E-02        |
| Firmicutes     | Faecalibacterium       | 1.000      | 1.930                  | 0.093            | 0.024 | <b>9.5E-05</b> | -0.038        | 0.022 | 9.3E-02  | -0.005        | 0.026 | 8.5E-01        | 0.016           | 0.025 | 5.3E-01        |
| Firmicutes     | Subdoligranulum        | 1.000      | 0.038                  | 0.142            | 0.038 | <b>1.6E-04</b> | -0.052        | 0.035 | 1.4E-01  | 0.081         | 0.040 | 4.5E-02        | 0.044           | 0.040 | 2.8E-01        |
| Firmicutes     | Clostridium            | 1.000      | 0.916                  | 0.138            | 0.039 | <b>3.7E-04</b> | 0.010         | 0.036 | 7.8E-01  | 0.027         | 0.041 | 5.1E-01        | 0.032           | 0.041 | 4.4E-01        |
| Firmicutes     | Lachnoanaerobaculum    | 0.988      | 0.010                  | 0.089            | 0.026 | <b>6.5E-04</b> | -0.034        | 0.024 | 1.7E-01  | 0.028         | 0.028 | 3.1E-01        | 0.051           | 0.028 | 6.5E-02        |
| Firmicutes     | Intestinimonas         | 1.000      | 0.171                  | 0.096            | 0.028 | <b>7.0E-04</b> | -0.030        | 0.027 | 2.6E-01  | 0.065         | 0.030 | 3.3E-02        | 0.084           | 0.030 | 5.4E-03        |
| Firmicutes     | Erysipelatoclostridium | 1.000      | 0.180                  | -0.093           | 0.028 | <b>9.8E-04</b> | 0.014         | 0.026 | 5.8E-01  | 0.012         | 0.030 | 6.9E-01        | -0.020          | 0.030 | 5.1E-01        |
| Actinobacteria | Cellulomonas           | 0.994      | 0.259                  | 0.048            | 0.015 | <b>1.6E-03</b> | 0.004         | 0.014 | 8.0E-01  | 0.047         | 0.016 | <b>3.6E-03</b> | 0.019           | 0.016 | 2.5E-01        |
| Firmicutes     | Eubacterium            | 1.000      | 1.707                  | 0.126            | 0.040 | <b>1.8E-03</b> | -0.009        | 0.038 | 8.1E-01  | -0.020        | 0.043 | 6.5E-01        | 0.037           | 0.043 | 3.9E-01        |
| Firmicutes     | Fournierella           | 1.000      | 0.040                  | 0.118            | 0.038 | <b>1.9E-03</b> | -0.006        | 0.036 | 8.6E-01  | 0.113         | 0.040 | <b>5.3E-03</b> | 0.047           | 0.040 | 2.4E-01        |
| Firmicutes     | Dorea                  | 1.000      | 1.083                  | 0.097            | 0.031 | <b>2.0E-03</b> | -0.026        | 0.029 | 3.7E-01  | -0.014        | 0.033 | 6.7E-01        | 0.024           | 0.033 | 4.8E-01        |
| Firmicutes     | Butyrivibrio           | 0.999      | 1.090                  | 0.056            | 0.018 | <b>2.1E-03</b> | -0.007        | 0.017 | 6.8E-01  | 0.018         | 0.019 | 3.5E-01        | -0.018          | 0.019 | 3.4E-01        |
| Actinobacteria | Eggerthella            | 0.994      | 0.094                  | -0.055           | 0.018 | <b>2.5E-03</b> | 0.033         | 0.017 | 5.1E-02  | -0.024        | 0.019 | 2.2E-01        | 0.029           | 0.019 | 1.3E-01        |
| Firmicutes     | Pseudoflavonifractor   | 0.999      | 0.035                  | 0.092            | 0.031 | <b>2.9E-03</b> | -0.010        | 0.029 | 7.2E-01  | 0.078         | 0.033 | 1.8E-02        | 0.102           | 0.033 | <b>1.8E-03</b> |
| Actinobacteria | Bifidobacterium        | 1.000      | 1.853                  | 0.051            | 0.017 | <b>3.0E-03</b> | -0.006        | 0.016 | 7.3E-01  | -0.033        | 0.018 | 7.1E-02        | -0.040          | 0.018 | 2.7E-02        |
| Bacteroidetes  | Porphyromonas          | 0.994      | 0.067                  | 0.070            | 0.024 | <b>4.1E-03</b> | -0.006        | 0.023 | 8.0E-01  | 0.041         | 0.026 | 1.1E-01        | 0.069           | 0.026 | 7.6E-03        |
| Bacteroidetes  | Parabacteroides        | 1.000      | 2.391                  | -0.081           | 0.028 | <b>4.2E-03</b> | 0.010         | 0.027 | 7.1E-01  | -0.057        | 0.030 | 6.2E-02        | 0.103           | 0.030 | <b>5.9E-04</b> |
| Firmicutes     | Bittarella             | 0.994      | 0.012                  | 0.080            | 0.028 | <b>4.9E-03</b> | -0.004        | 0.027 | 8.8E-01  | 0.059         | 0.030 | 5.1E-02        | 0.075           | 0.030 | 1.3E-02        |
| Actinobacteria | Adlercreutzia          | 0.878      | 0.019                  | 0.034            | 0.012 | 6.1E-03        | -0.006        | 0.011 | 6.0E-01  | 0.011         | 0.013 | 3.9E-01        | 0.011           | 0.013 | 3.8E-01        |
| Firmicutes     | Unclassified           | 1.000      | 0.156                  | 0.106            | 0.039 | 6.4E-03        | -0.061        | 0.036 | 9.1E-02  | -0.001        | 0.041 | 9.8E-01        | 0.097           | 0.041 | 1.9E-02        |
| Firmicutes     | Holdemania             | 0.994      | 0.024                  | 0.064            | 0.024 | 7.0E-03        | -0.024        | 0.022 | 2.7E-01  | 0.022         | 0.025 | 3.8E-01        | 0.051           | 0.025 | 4.3E-02        |
| Firmicutes     | Unclassified           | 1.000      | 0.120                  | 0.099            | 0.038 | 8.6E-03        | -0.087        | 0.035 | 1.3E-02  | 0.046         | 0.040 | 2.6E-01        | 0.067           | 0.040 | 9.4E-02        |
| Firmicutes     | Blautia                | 1.000      | 4.058                  | -0.143           | 0.054 | 8.6E-03        | 0.045         | 0.051 | 3.8E-01  | -0.005        | 0.058 | 9.3E-01        | -0.011          | 0.058 | 8.5E-01        |
| Firmicutes     | Marvinbryantia         | 0.997      | 0.011                  | 0.084            | 0.032 | 9.1E-03        | -0.001        | 0.030 | 9.8E-01  | -0.012        | 0.034 | 7.3E-01        | 0.026           | 0.034 | 4.4E-01        |
| Fusobacteria   | Fusobacterium          | 0.729      | 0.080                  | -0.030           | 0.011 | 9.7E-03        | 0.007         | 0.011 | 5.3E-01  | -0.011        | 0.012 | 3.8E-01        | -0.012          | 0.012 | 3.2E-01        |
| Firmicutes     | Unclassified           | 1.000      | 0.171                  | 0.114            | 0.044 | 1.0E-02        | -0.040        | 0.042 | 3.3E-01  | 0.021         | 0.047 | 6.6E-01        | -0.037          | 0.047 | 4.3E-01        |
| Bacteroidetes  | Barnesiella            | 0.999      | 0.828                  | 0.038            | 0.015 | 1.2E-02        | -0.018        | 0.014 | 1.9E-01  | 0.004         | 0.016 | 8.0E-01        | 0.025           | 0.016 | 1.2E-01        |
| Firmicutes     | Oscillibacter          | 1.000      | 1.513                  | 0.074            | 0.030 | 1.2E-02        | -0.029        | 0.028 | 3.0E-01  | 0.027         | 0.032 | 3.9E-01        | 0.073           | 0.031 | 2.0E-02        |

|                 |                       |       |        |        |       |         |        |       |         |        |       |                |        |       |                |
|-----------------|-----------------------|-------|--------|--------|-------|---------|--------|-------|---------|--------|-------|----------------|--------|-------|----------------|
| Bacteroidetes   | Alistipes             | 1.000 | 5.422  | 0.061  | 0.024 | 1.3E-02 | -0.024 | 0.023 | 2.9E-01 | -0.011 | 0.026 | 6.7E-01        | 0.077  | 0.026 | <b>2.9E-03</b> |
| Bacteroidetes   | Bacteroides           | 1.000 | 35.801 | -0.086 | 0.037 | 2.1E-02 | 0.034  | 0.035 | 3.3E-01 | -0.093 | 0.040 | 1.9E-02        | 0.035  | 0.040 | 3.8E-01        |
| Firmicutes      | Roseburia             | 1.000 | 5.051  | 0.070  | 0.031 | 2.3E-02 | -0.001 | 0.029 | 9.6E-01 | 0.021  | 0.033 | 5.2E-01        | -0.031 | 0.033 | 3.4E-01        |
| Bacteroidetes   | Prevotella            | 1.000 | 12.663 | 0.034  | 0.015 | 2.4E-02 | 0.001  | 0.014 | 9.2E-01 | 0.044  | 0.016 | 6.0E-03        | 0.021  | 0.016 | 1.9E-01        |
| Firmicutes      | Holdemanella          | 1.000 | 0.163  | 0.051  | 0.023 | 2.5E-02 | -0.034 | 0.021 | 1.1E-01 | 0.024  | 0.024 | 3.2E-01        | -0.020 | 0.024 | 4.1E-01        |
| Verrucomicrobia | Akkermansia           | 0.968 | 0.766  | 0.023  | 0.010 | 2.8E-02 | -0.003 | 0.010 | 7.3E-01 | 0.012  | 0.011 | 2.8E-01        | 0.039  | 0.011 | <b>4.2E-04</b> |
| Firmicutes      | Unclassified          | 1.000 | 4.705  | 0.050  | 0.023 | 2.9E-02 | -0.019 | 0.022 | 3.8E-01 | -0.044 | 0.024 | 7.1E-02        | -0.041 | 0.024 | 9.3E-02        |
| Firmicutes      | Streptococcus         | 1.000 | 0.322  | -0.049 | 0.023 | 3.4E-02 | -0.005 | 0.022 | 8.3E-01 | -0.004 | 0.025 | 8.7E-01        | 0.005  | 0.025 | 8.5E-01        |
| Spirochaetes    | Treponema             | 0.907 | 0.024  | 0.043  | 0.020 | 3.5E-02 | -0.023 | 0.019 | 2.2E-01 | 0.053  | 0.022 | 1.4E-02        | 0.008  | 0.021 | 7.2E-01        |
| Proteobacteria  | Escherichia           | 0.994 | 1.973  | -0.027 | 0.013 | 3.6E-02 | -0.004 | 0.012 | 7.7E-01 | 0.002  | 0.014 | 8.8E-01        | 0.022  | 0.014 | 1.1E-01        |
| Proteobacteria  | Shigella              | 0.785 | 0.592  | -0.016 | 0.008 | 5.0E-02 | -0.005 | 0.008 | 4.7E-01 | 0.004  | 0.009 | 6.4E-01        | 0.012  | 0.008 | 1.5E-01        |
| Firmicutes      | Tyzzera               | 1.000 | 0.253  | -0.073 | 0.040 | 6.4E-02 | 0.018  | 0.037 | 6.3E-01 | -0.016 | 0.042 | 7.0E-01        | -0.047 | 0.042 | 2.7E-01        |
| Firmicutes      | Coprococcus           | 1.000 | 0.977  | 0.057  | 0.031 | 7.1E-02 | -0.027 | 0.029 | 3.5E-01 | -0.017 | 0.034 | 6.2E-01        | -0.066 | 0.033 | 4.6E-02        |
| Euryarchaeota   | Methanobrevibacter    | 0.717 | 0.080  | 0.015  | 0.009 | 1.0E-01 | 0.007  | 0.009 | 4.4E-01 | 0.045  | 0.010 | <b>2.3E-06</b> | -0.007 | 0.010 | 4.4E-01        |
| Firmicutes      | Faecalicatena         | 1.000 | 0.041  | 0.076  | 0.046 | 1.0E-01 | 0.047  | 0.043 | 2.8E-01 | 0.048  | 0.049 | 3.3E-01        | 0.137  | 0.049 | <b>5.0E-03</b> |
| Firmicutes      | Ruminiclostridium     | 1.000 | 0.924  | 0.029  | 0.018 | 1.1E-01 | -0.022 | 0.017 | 1.8E-01 | 0.048  | 0.019 | 1.2E-02        | 0.036  | 0.019 | 5.6E-02        |
| Firmicutes      | Hungatella            | 1.000 | 0.132  | -0.051 | 0.032 | 1.1E-01 | -0.012 | 0.030 | 6.9E-01 | 0.022  | 0.034 | 5.2E-01        | 0.065  | 0.034 | 5.6E-02        |
| Firmicutes      | Acidaminococcus       | 0.936 | 0.361  | -0.016 | 0.010 | 1.2E-01 | 0.002  | 0.010 | 8.2E-01 | 0.012  | 0.011 | 2.7E-01        | 0.010  | 0.011 | 3.8E-01        |
| Actinobacteria  | Collinsella           | 0.999 | 0.368  | 0.030  | 0.019 | 1.2E-01 | 0.011  | 0.018 | 5.6E-01 | 0.009  | 0.021 | 6.5E-01        | 0.044  | 0.020 | 3.1E-02        |
| Firmicutes      | Acetivibrio           | 0.999 | 0.032  | 0.039  | 0.026 | 1.3E-01 | 0.021  | 0.024 | 3.9E-01 | 0.045  | 0.027 | 9.9E-02        | 0.049  | 0.027 | 7.1E-02        |
| Firmicutes      | Dialister             | 0.931 | 0.318  | 0.015  | 0.010 | 1.3E-01 | -0.005 | 0.009 | 6.2E-01 | 0.001  | 0.011 | 9.4E-01        | 0.001  | 0.011 | 9.1E-01        |
| Firmicutes      | Butyricoccus          | 1.000 | 0.037  | 0.048  | 0.034 | 1.5E-01 | -0.020 | 0.031 | 5.2E-01 | 0.052  | 0.036 | 1.5E-01        | -0.002 | 0.036 | 9.6E-01        |
| Actinobacteria  | Actinomyces           | 0.997 | 0.015  | -0.046 | 0.032 | 1.5E-01 | -0.049 | 0.030 | 1.1E-01 | 0.012  | 0.034 | 7.2E-01        | -0.021 | 0.034 | 5.4E-01        |
| Firmicutes      | Phascolarctobacterium | 0.979 | 0.276  | 0.017  | 0.012 | 1.5E-01 | 0.016  | 0.011 | 1.6E-01 | 0.020  | 0.013 | 1.1E-01        | -0.014 | 0.013 | 2.7E-01        |
| Firmicutes      | Lactococcus           | 0.767 | 0.011  | -0.016 | 0.011 | 1.6E-01 | -0.007 | 0.011 | 5.2E-01 | 0.006  | 0.012 | 6.2E-01        | -0.016 | 0.012 | 1.9E-01        |
| Proteobacteria  | Proteus               | 0.094 | 0.026  | -0.026 | 0.019 | 1.6E-01 | 0.009  | 0.017 | 5.9E-01 | -0.014 | 0.020 | 4.7E-01        | -0.006 | 0.020 | 7.4E-01        |
| Firmicutes      | Megamonas             | 0.719 | 0.255  | 0.014  | 0.010 | 1.8E-01 | 0.008  | 0.010 | 3.9E-01 | -0.015 | 0.011 | 1.8E-01        | -0.006 | 0.011 | 6.0E-01        |
| Firmicutes      | Dielma                | 0.976 | 0.016  | -0.025 | 0.019 | 1.9E-01 | -0.016 | 0.018 | 3.7E-01 | -0.008 | 0.020 | 7.0E-01        | 0.001  | 0.020 | 9.8E-01        |
| Firmicutes      | Veillonella           | 0.976 | 0.046  | -0.021 | 0.016 | 2.0E-01 | -0.019 | 0.015 | 2.1E-01 | 0.021  | 0.017 | 2.2E-01        | -0.045 | 0.017 | 8.5E-03        |
| Firmicutes      | Anaerostipes          | 1.000 | 0.915  | -0.033 | 0.026 | 2.0E-01 | -0.014 | 0.024 | 5.6E-01 | -0.079 | 0.028 | <b>4.7E-03</b> | -0.009 | 0.028 | 7.3E-01        |
| Firmicutes      | Intestinibacter       | 0.988 | 0.086  | 0.020  | 0.016 | 2.2E-01 | -0.032 | 0.015 | 3.5E-02 | -0.025 | 0.017 | 1.5E-01        | -0.081 | 0.017 | <b>2.9E-06</b> |
| Bacteroidetes   | Odoribacter           | 1.000 | 0.931  | 0.032  | 0.026 | 2.2E-01 | 0.007  | 0.024 | 7.8E-01 | 0.037  | 0.028 | 1.8E-01        | 0.085  | 0.027 | <b>2.0E-03</b> |
| Actinobacteria  | Gordonibacter         | 0.987 | 0.028  | 0.025  | 0.022 | 2.6E-01 | 0.022  | 0.021 | 3.0E-01 | -0.008 | 0.023 | 7.5E-01        | 0.079  | 0.023 | <b>6.6E-04</b> |
| Actinobacteria  | Senegalimassilia      | 0.946 | 0.032  | 0.016  | 0.014 | 2.8E-01 | -0.002 | 0.014 | 9.1E-01 | 0.001  | 0.015 | 9.3E-01        | 0.028  | 0.015 | 7.0E-02        |



|                |                   |       |       |        |       |         |        |       |         |        |       |                |        |       |                |
|----------------|-------------------|-------|-------|--------|-------|---------|--------|-------|---------|--------|-------|----------------|--------|-------|----------------|
| Firmicutes     | Megasphaera       | 0.935 | 0.076 | 0.014  | 0.013 | 2.9E-01 | 0.015  | 0.012 | 2.2E-01 | -0.007 | 0.014 | 5.9E-01        | 0.004  | 0.014 | 7.5E-01        |
| Firmicutes     | Enterococcus      | 0.983 | 0.062 | 0.019  | 0.019 | 3.3E-01 | -0.002 | 0.018 | 9.3E-01 | 0.000  | 0.020 | 9.9E-01        | -0.006 | 0.020 | 7.5E-01        |
| Firmicutes     | Catenibacterium   | 0.968 | 0.324 | 0.010  | 0.011 | 3.3E-01 | -0.003 | 0.010 | 7.7E-01 | 0.035  | 0.011 | <b>2.5E-03</b> | 0.002  | 0.011 | 8.8E-01        |
| Firmicutes     | Unclassified      | 1.000 | 0.025 | -0.038 | 0.039 | 3.4E-01 | -0.045 | 0.037 | 2.2E-01 | -0.021 | 0.042 | 6.2E-01        | 0.038  | 0.041 | 3.6E-01        |
| Proteobacteria | Parasutterella    | 0.910 | 0.209 | -0.009 | 0.010 | 3.9E-01 | -0.008 | 0.009 | 4.0E-01 | -0.010 | 0.011 | 3.5E-01        | 0.001  | 0.010 | 9.3E-01        |
| Proteobacteria | Sutterella        | 0.967 | 0.658 | 0.008  | 0.010 | 3.9E-01 | -0.014 | 0.009 | 1.2E-01 | -0.006 | 0.011 | 5.4E-01        | 0.001  | 0.010 | 9.0E-01        |
| Bacteroidetes  | Paraprevotella    | 1.000 | 0.310 | 0.016  | 0.019 | 3.9E-01 | 0.021  | 0.018 | 2.4E-01 | 0.045  | 0.020 | 2.4E-02        | 0.048  | 0.020 | 1.7E-02        |
| Bacteroidetes  | Sanguibacteroides | 0.830 | 0.011 | 0.011  | 0.013 | 4.1E-01 | -0.002 | 0.012 | 8.9E-01 | 0.011  | 0.014 | 4.3E-01        | 0.048  | 0.013 | <b>4.4E-04</b> |
| Proteobacteria | Klebsiella        | 0.946 | 0.739 | -0.008 | 0.010 | 4.3E-01 | -0.006 | 0.010 | 5.7E-01 | -0.005 | 0.011 | 6.5E-01        | -0.003 | 0.011 | 7.7E-01        |
| Firmicutes     | Mitsuokella       | 0.334 | 0.048 | 0.008  | 0.010 | 4.3E-01 | -0.005 | 0.010 | 6.2E-01 | 0.012  | 0.011 | 2.6E-01        | 0.002  | 0.011 | 8.4E-01        |
| Proteobacteria | Dakarella         | 0.369 | 0.028 | -0.007 | 0.010 | 4.5E-01 | 0.000  | 0.009 | 9.9E-01 | 0.004  | 0.010 | 7.1E-01        | 0.003  | 0.010 | 7.5E-01        |
| Proteobacteria | Comamonas         | 0.139 | 0.011 | 0.011  | 0.016 | 4.8E-01 | 0.007  | 0.015 | 6.2E-01 | 0.012  | 0.017 | 4.7E-01        | -0.012 | 0.017 | 4.8E-01        |
| Bacteroidetes  | Butyricimonas     | 0.996 | 0.216 | 0.013  | 0.018 | 4.8E-01 | -0.017 | 0.017 | 3.0E-01 | 0.010  | 0.019 | 5.9E-01        | 0.045  | 0.019 | 1.6E-02        |
| Proteobacteria | Pseudomonas       | 0.450 | 0.024 | 0.008  | 0.012 | 5.2E-01 | -0.001 | 0.011 | 9.0E-01 | 0.006  | 0.013 | 6.3E-01        | -0.005 | 0.013 | 7.2E-01        |
| Proteobacteria | Kluyvera          | 0.582 | 0.015 | 0.007  | 0.011 | 5.4E-01 | -0.003 | 0.010 | 7.7E-01 | -0.003 | 0.012 | 8.3E-01        | 0.004  | 0.012 | 7.3E-01        |
| Firmicutes     | Anaerotruncus     | 1.000 | 0.127 | 0.017  | 0.031 | 5.8E-01 | 0.005  | 0.029 | 8.7E-01 | 0.008  | 0.033 | 8.1E-01        | 0.120  | 0.032 | <b>2.1E-04</b> |
| Firmicutes     | Lactobacillus     | 0.985 | 0.160 | -0.008 | 0.014 | 5.8E-01 | -0.015 | 0.013 | 2.5E-01 | 0.011  | 0.015 | 4.7E-01        | 0.010  | 0.015 | 5.1E-01        |
| Firmicutes     | Coprobacillus     | 1.000 | 0.086 | 0.014  | 0.030 | 6.5E-01 | -0.046 | 0.028 | 1.0E-01 | 0.017  | 0.032 | 6.0E-01        | 0.059  | 0.032 | 6.4E-02        |
| Firmicutes     | Phoceia           | 0.994 | 0.025 | -0.011 | 0.024 | 6.6E-01 | -0.004 | 0.023 | 8.5E-01 | 0.019  | 0.026 | 4.6E-01        | 0.058  | 0.025 | 2.3E-02        |
| Firmicutes     | Eisenbergiella    | 0.994 | 0.111 | 0.008  | 0.019 | 6.6E-01 | 0.012  | 0.018 | 5.1E-01 | 0.003  | 0.020 | 8.9E-01        | 0.042  | 0.020 | 3.6E-02        |
| Proteobacteria | Bilophila         | 0.970 | 0.315 | 0.005  | 0.013 | 7.2E-01 | -0.011 | 0.012 | 3.7E-01 | -0.010 | 0.014 | 4.8E-01        | 0.017  | 0.013 | 2.2E-01        |
| Firmicutes     | Ruthenibacterium  | 1.000 | 0.372 | 0.009  | 0.026 | 7.3E-01 | -0.015 | 0.025 | 5.5E-01 | 0.030  | 0.028 | 2.9E-01        | 0.077  | 0.028 | 5.6E-03        |
| Proteobacteria | Desulfovibrio     | 0.779 | 0.041 | -0.003 | 0.010 | 7.5E-01 | -0.011 | 0.009 | 2.5E-01 | -0.002 | 0.011 | 8.6E-01        | 0.022  | 0.011 | 4.0E-02        |
| Synergistetes  | Pyramidobacter    | 0.275 | 0.017 | -0.004 | 0.012 | 7.7E-01 | 0.005  | 0.012 | 6.7E-01 | 0.026  | 0.013 | 4.5E-02        | 0.035  | 0.013 | 7.9E-03        |
| Bacteroidetes  | Coprobacter       | 0.997 | 0.096 | 0.005  | 0.023 | 8.2E-01 | -0.016 | 0.021 | 4.5E-01 | -0.033 | 0.024 | 1.7E-01        | 0.053  | 0.024 | 3.0E-02        |
| Firmicutes     | Sellimonas        | 0.988 | 0.028 | -0.001 | 0.019 | 9.7E-01 | 0.032  | 0.017 | 6.7E-02 | 0.045  | 0.020 | 2.4E-02        | 0.024  | 0.020 | 2.2E-01        |
| Synergistetes  | Cloacibacillus    | 0.349 | 0.016 | 0.000  | 0.011 | 9.9E-01 | 0.009  | 0.011 | 4.2E-01 | 0.030  | 0.012 | 1.1E-02        | 0.021  | 0.012 | 8.0E-02        |

Data are differences (beta) and standard error (SE) in metabolites per SD increment of gut bacterial taxa (central-log transformed), adjusted for age, sex, study center, smoking, education, family income, physical activity, dietary quality, use of antibiotics, and use of probiotics.

P-values remained significant after FDR correction are highlighted in bold.
